# Supplementary material
Source: PubMed Central journal article supplement (PMC2657720)
Supplement: NIHMS83407-supplement-01.pdf [file NIHMS83407-supplement-01.pdf]

# Supporting Information

## **S-Methylidene ~~Transfer~~-Agents: Preparation of Chiral Non-Racemic ~~Carbo~~eyelesHeterocycles**

David C. Forbes,<sup>a,\*</sup> Sampada V. Bettigeri,<sup>a</sup> Samit A. Patrawala,<sup>a</sup>

Susanna C. Pischek,<sup>a</sup> and Michael C. Standen<sup>b,\*</sup>

<sup>a</sup>Department of Chemistry, University of South Alabama, Mobile, AL 36688, USA

<sup>b</sup>Synthetech, Albany, OR, 97321, USA

\*corresponding authors: [dforbes@jaguar1.usouthal.edu](mailto:dforbes@jaguar1.usouthal.edu) and [mikes@synthetech.com](mailto:mikes@synthetech.com)

S1 – Table of Contents

S4 – General Experimental Considerations

S5 – Representative Procedure for ~~Sulfonium~~MethylideneMethylene Epoxidations

S6 – Analytical Data for 2-Phenyloxirane

S7 – <sup>1</sup>H NMR of 2-Phenyloxirane

S8 – <sup>13</sup>C NMR of 2-Phenyloxirane

S9 – Analytical Data for 2-(4-Nitrophenyl)oxirane

S10 – <sup>1</sup>H NMR of 2-(4-Nitrophenyl)oxirane

S11 – <sup>13</sup>C NMR of 2-(4-Nitrophenyl)oxirane

S12 – Analytical Data for 2-(4-Chlorophenyl)oxirane

S13 –  $^1\text{H}$  NMR of 2-(4-Chlorophenyl)oxirane  
S14 –  $^{13}\text{C}$  NMR of 2-(4-Chlorophenyl)oxirane  
S15 – Analytical Data for 2-(2,6-Dichlorophenyl)oxirane  
S16 –  $^1\text{H}$  NMR of 2-(2,6-Dichlorophenyl)oxirane  
S17 –  $^{13}\text{C}$  NMR of 2-(2,6-Dichlorophenyl)oxirane  
S18 – Analytical Data for 2-(4-Methoxyphenyl)oxirane  
S19 –  $^1\text{H}$  NMR of 2-(4-Methoxyphenyl)oxirane  
S20 –  $^{13}\text{C}$  NMR of 2-(4-Methoxyphenyl)oxirane  
S21 – Analytical Data for 2-(3,4-Methylenedioxyphenyl)oxirane  
S22 –  $^1\text{H}$  NMR of 2-(3,4-Methylenedioxyphenyl)oxirane  
S23 –  $^{13}\text{C}$  NMR of 2-(3,4-Methylenedioxyphenyl)oxirane  
S24 – Analytical Data for 2-(3-Bromo-4-methoxyphenyl)oxirane  
S25 –  $^1\text{H}$  NMR of 2-(3-Bromo-4-methoxyphenyl)oxirane  
S26 –  $^{13}\text{C}$  NMR of 2-(3-Bromo-4-methoxyphenyl)oxirane  
S27 – Analytical Data for 2-(3,4,5-Trimethoxyphenyl)oxirane  
S28 –  $^1\text{H}$  NMR of 2-(3,4,5-Trimethoxyphenyl)oxirane  
S29 –  $^{13}\text{C}$  NMR of 2-(3,4,5-Trimethoxyphenyl)oxirane  
S30 – Analytical Data for 1,2-Epoxydodecane  
S31 –  $^1\text{H}$  NMR of 1,2-Epoxydodecane  
S32 –  $^{13}\text{C}$  NMR of 1,2-Epoxydodecane  
S33 – Analytical Data for 2-Methyl-2-phenyloxirane  
S34 –  $^1\text{H}$  NMR of 2-Methyl-2-phenyloxirane  
S35 –  $^{13}\text{C}$  NMR of 2-Methyl-2-phenyloxirane  
S36 – Representative Procedure for the Kinetic Resolution of Aryl Oxiranes  
S37 – Supplemental Data for (2*R*)-2-Phenyloxirane  
S38 – HPLC Chromatographs for Racemic and Resolved 2-Phenyloxirane  
S39 – Supplemental Data for (2*S*)-2-Phenyloxirane

- S40 – HPLC Chromatographs for Racemic and Resolved 2-Phenyloxirane
- S41 – Supplemental Data for (2*R*)-2-(4-Chlorophenyl)oxirane
- S42 – HPLC Chromatographs for Racemic and Resolved 2-(4-Chlorophenyl)oxirane
- S43 – Supplemental Data for 2-(3-Bromo-4-methoxy)oxirane
- S44 – HPLC Chromatographs for Racemic and Resolved 2-(3-Bromo-4-methoxy)oxirane
- S45 – Supplemental Data for (2*S*)-2-(3,4,5-Trimethoxyphenyl)oxirane
- S46 – Supplemental Data for (2*R*)-2-(3,4,5-Trimethoxyphenyl)oxirane
- S46 – Literature Cited

## General Experimental Considerations

$^1\text{H}$  NMR (300 MHz) and  $^{13}\text{C}$  NMR (75 MHz) spectra were obtained as solutions in  $\text{CDCl}_3$ . Chemical shifts were reported in parts per million (ppm) and referenced to  $\delta$  7.27 ( $^1\text{H}$  NMR) and  $\delta$  77.00 ( $^{13}\text{C}$  NMR). Infrared spectra were recorded using a FT IR and reported in wavenumbers ( $\text{cm}^{-1}$ ). Analytical high pressure liquid chromatography (HPLC) was performed with a built-in photometric detector using a (*R,R*)-Whelk-O 1 column (4.6 mm  $\times$  25cm). Solvents for HPLC analyses were of spectroscopic grade and filtered before use. GC analyses were performed using a ZB-5 with guardian (30 meter + 5 meter guardian end, 0.25 mm ID, and 0.25  $\mu\text{m}$  film thickness). Optical rotations were recorded on a digital polarimeter and are reported as follows:  $[\alpha]^T$  (*c*, solvent) where *c* = g/100mL. TLC analyses were performed on flexible aluminium backed TLC plates with a fluorescent indicator. Detection was conducted by UV absorption (254 nm) followed by charring with 10%  $\text{KMnO}_4$  in water. Solutions were concentrated in vacuo using a rotary evaporator. The resulting residue was purified using a neutral alumina column (150 mesh, 58 $\text{\AA}$ ) unless specified otherwise. All chemicals used for synthetic procedures were reagent grade or better.

### Representative procedure for ~~sulfonium-methylenemethylene~~ epoxidations

An oven-dried 25 mL round-bottomed flask was equipped with a stir bar, septum, and water-jacketed condenser. The system was next charged with aldehyde (1.0 mmol, 1.0 equiv), cesium carbonate (2.0 equiv) and THF (3.0 mL). To this slurry was added a solution of betaine (2.0 equiv) in THF (2.0 mL) via syringe in two equal portions at 6 h intervals. The system was externally heated to 80 °C (sand bath) and the reaction mixture was allowed to stir for a period of 12 h. After cooling to room temperature, the reaction mixture was filtered over a pad of Celite, concentrated in vacuo and then immediately purified by chromatography (neutral alumina (150 mesh, 58 Å)) using a gradient eluent system of hexanes and ethyl acetate to afford analytically pure oxirane.

## 2-Phenyloxirane

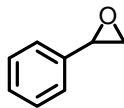

C<sub>8</sub>H<sub>8</sub>O  
Mol. Wt.: 120.15

From the combination of benzaldehyde (0.106 g, 1.00 mmol), cesium carbonate (0.652 g, 2.00 mmol), and carboxymethylmethylphenylsulfonium trifluoromethanesulfonate (0.664 g, 2.00 mmol) in 5.0 mL of THF, 0.114 g (95% yield) of the title compound was isolated as an oil after purification by column chromatography. Analytical data: <sup>1</sup>H NMR (300 MHz, CDCl<sub>3</sub>) δ 7.33-7.28 (m, 5H), 3.86 (dd, *J* = 2.4, *J* = 2.4 1H), 3.15 (dd, *J* = 4.1, *J* = 4.1, 1H), 2.81 (dd, *J* = 2.7, *J* = 2.7, 1H), <sup>13</sup>C NMR (75 MHz, CDCl<sub>3</sub>) δ 137.5, 128.4, 128.1, 125.4, 52.2, 51.1; TLC R<sub>f</sub> 0.31 (EtOAc/hexane, 1/9). The analytical data obtained is consistent with commercial and previously reported material.<sup>1</sup>

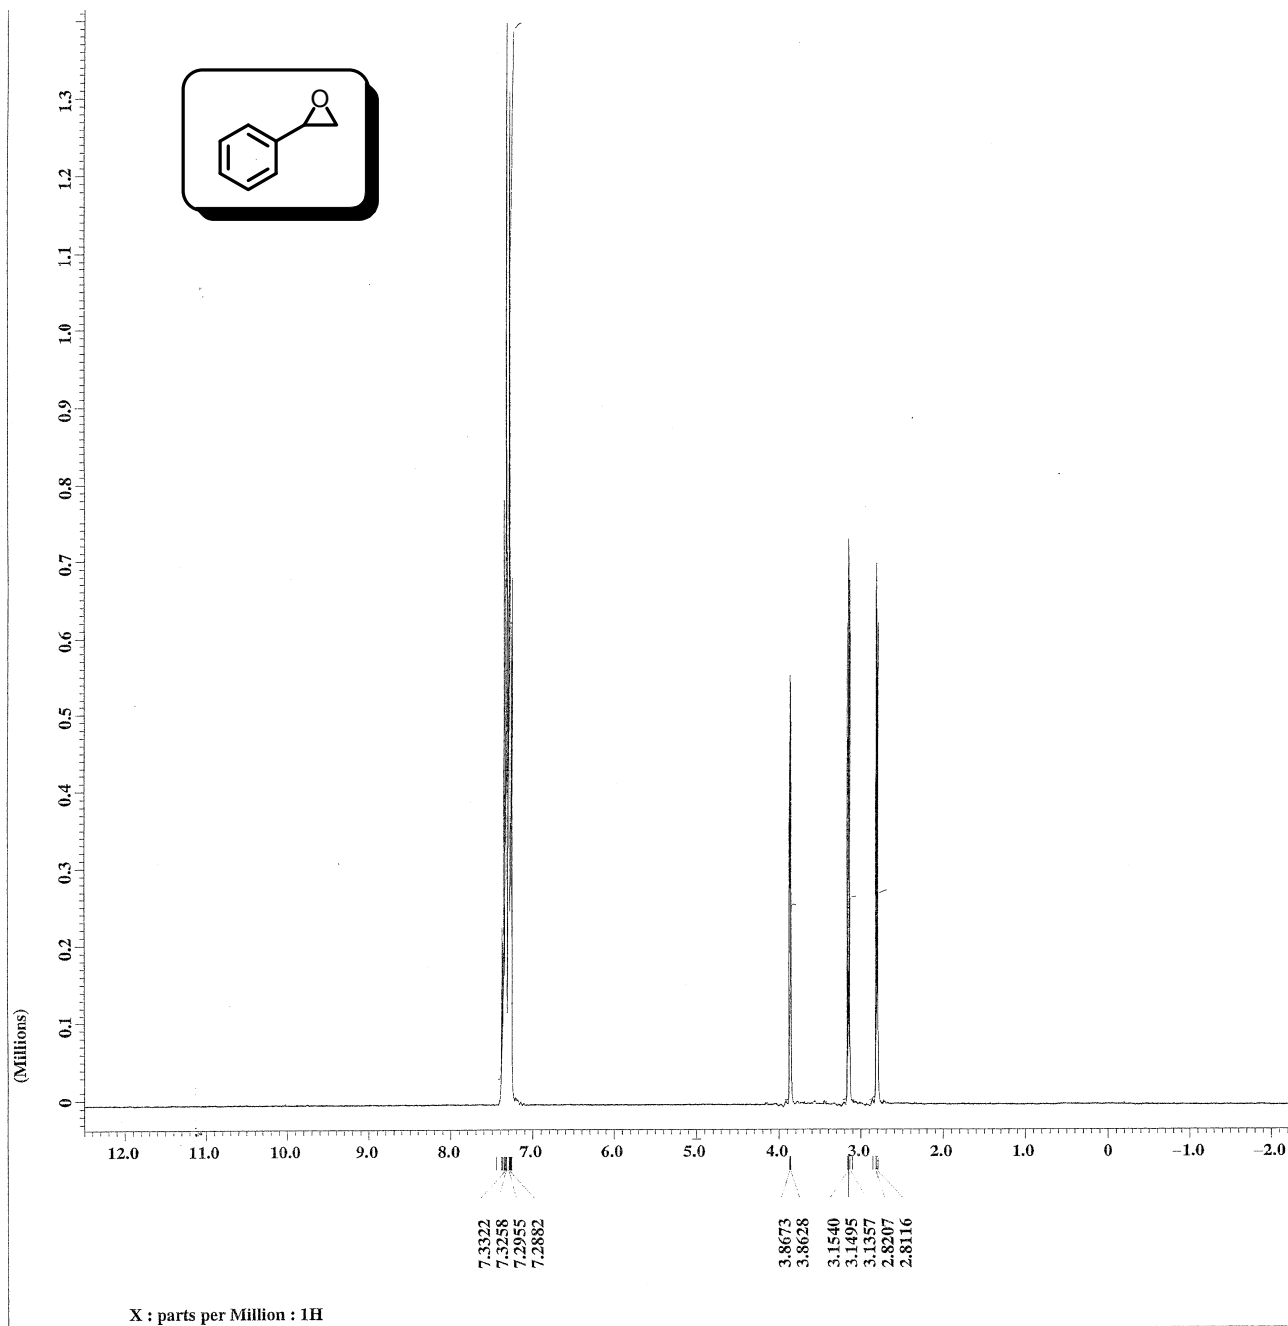

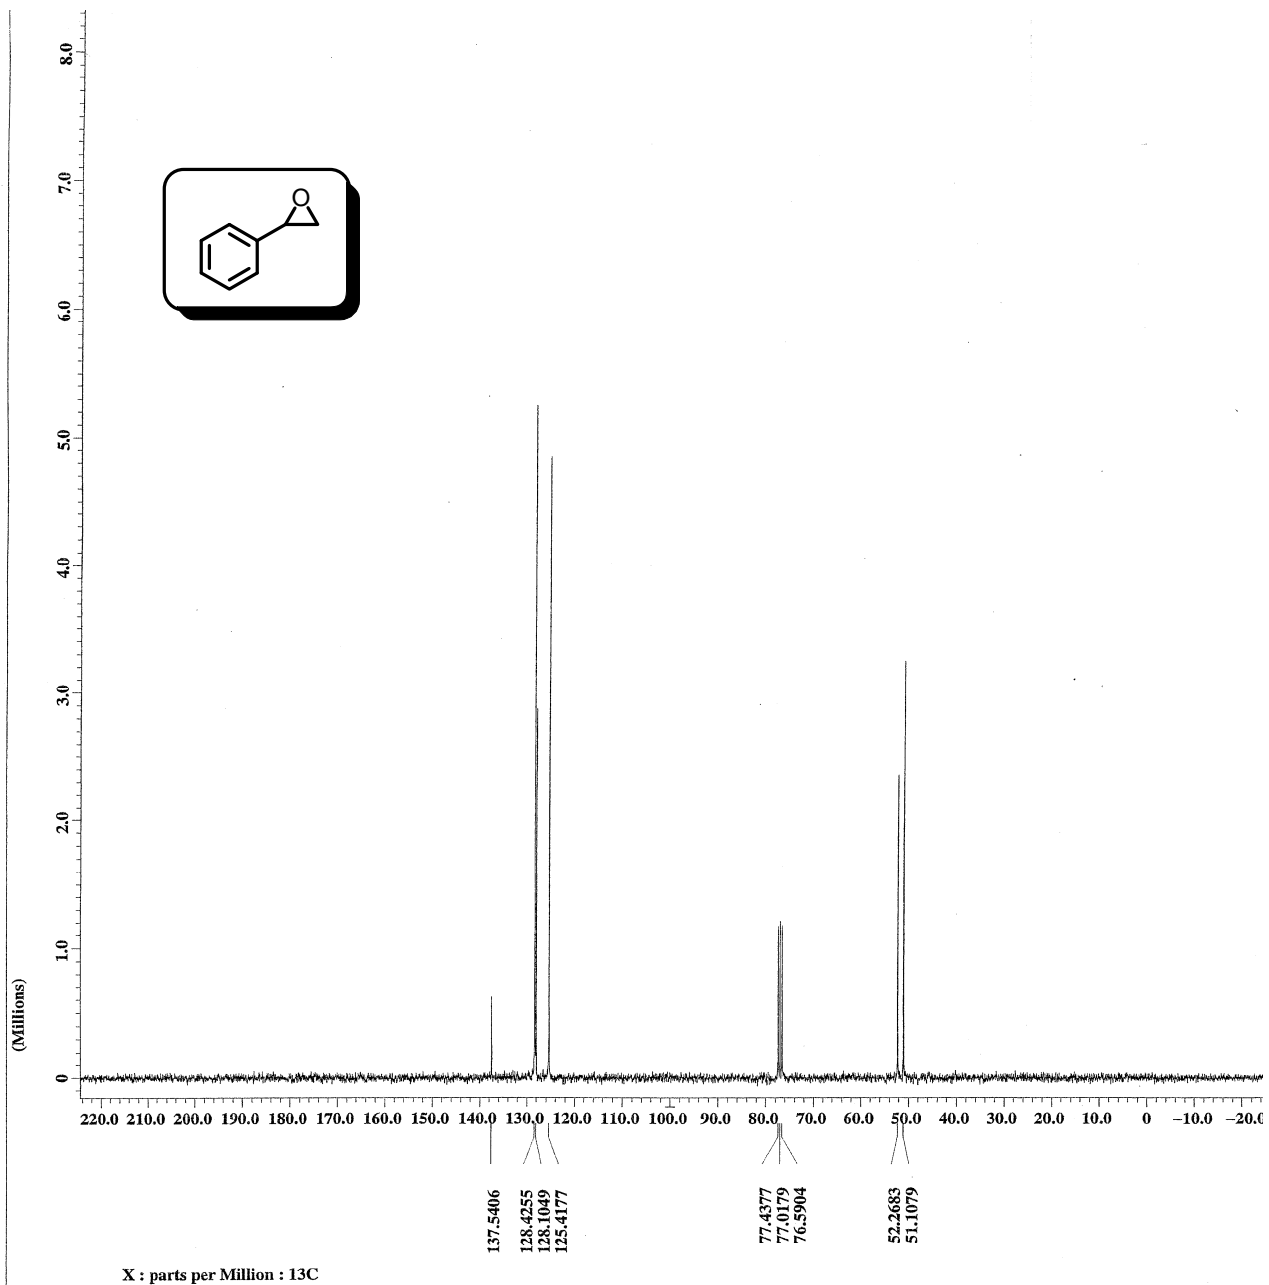



## 2-(4-Nitrophenyl)oxirane

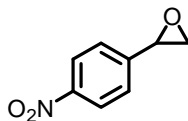

C<sub>8</sub>H<sub>7</sub>NO<sub>3</sub>  
Mol. Wt.: 165.15

From the combination of 4-nitrobenzaldehyde (0.151 g, 1.00 mmol), cesium carbonate (0.652 g, 2.00 mmol), and carboxymethylmethylphenylsulfonium trifluoromethanesulfonate (0.664 g, 2.00 mmol) in 5.0 mL of THF, 0.160 g (97% yield) of the title compound was isolated as a yellow solid after purification by column chromatography. Analytical data: <sup>1</sup>H NMR (300 MHz, CDCl<sub>3</sub>) δ 8.20 (d, *J* = 8.2, 2H), 7.44 (d, *J* = 8.2, 2H), 3.95 (dd, *J* = 3.8, *J* = 3.8, 1H), 3.22 (dd, *J* = 4.1, *J* = 4.1, 1H), 2.77 (dd, *J* = 2.4, *J* = 2.4, 1H), <sup>13</sup>C NMR (75 MHz, CDCl<sub>3</sub>) δ 147.8, 145.2, 126.2, 123.8, 51.6, 51.4; TLC R<sub>f</sub> 0.35 (EtOAc/hexane, 1/9); melting point 84-85°C (literature melting point 85°C).<sup>2</sup> The analytical data obtained is consistent with commercial and previously reported material.<sup>2</sup>

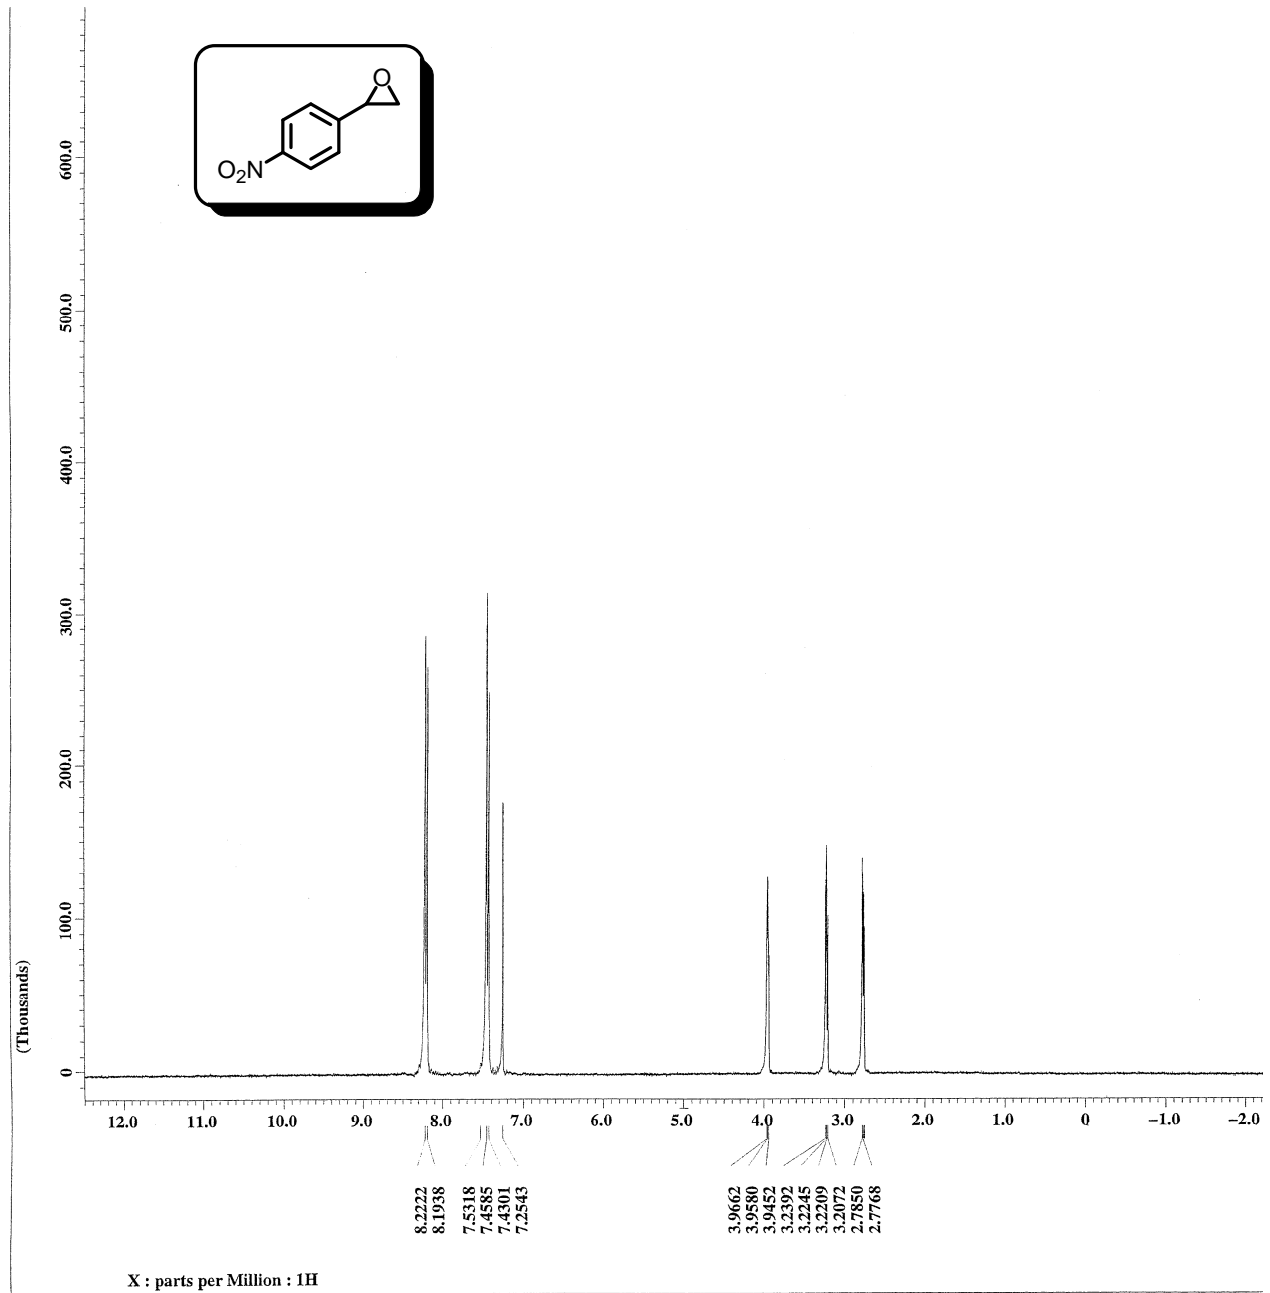

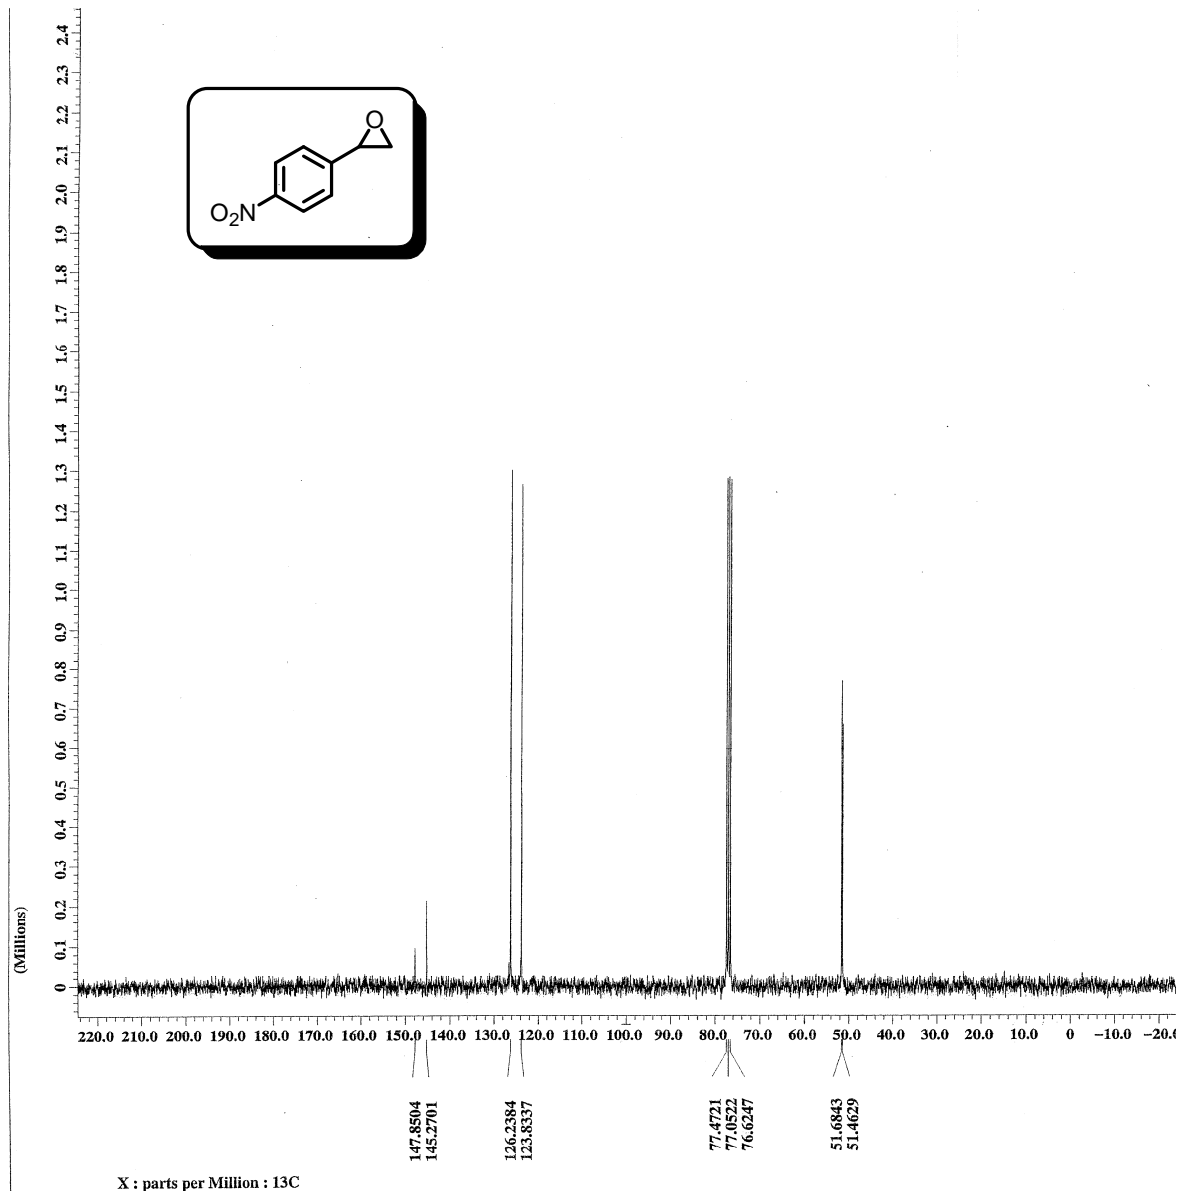

## 2-(4-Chlorophenyl)oxirane

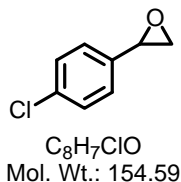

From the combination of 4-chlorobenzaldehyde (0.140 g, 1.00 mmol), cesium carbonate (0.652 g, 2.00 mmol), and carboxymethylmethylphenylsulfonium trifluoromethanesulfonate (0.664 g, 2.00 mmol) in 5.0 mL of THF, 0.149 g (97% yield) of the title compound was isolated as an oil after purification by column chromatography. Analytical data:  $^1H$  NMR (300 MHz,  $CDCl_3$ )  $\delta$  7.32 (d,  $J = 8.5$ , 2H), 7.20 (d,  $J = 8.5$ , 2H), 3.84 (dd,  $J = 2.7$ ,  $J = 2.7$ , 1H), 3.15 (dd,  $J = 4.1$ ,  $J = 4.1$ , 1H), 2.75 (dd,  $J = 2.4$ ,  $J = 2.4$ , 1H),  $^{13}C$  NMR (75 MHz,  $CDCl_3$ )  $\delta$  136.1, 133.7, 128.7, 128.6, 126.7, 51.6, 51.1; TLC  $R_f$  0.35 (EtOAc/hexane, 1/9). The analytical data obtained is consistent with commercial and previously reported material.<sup>2,3</sup>

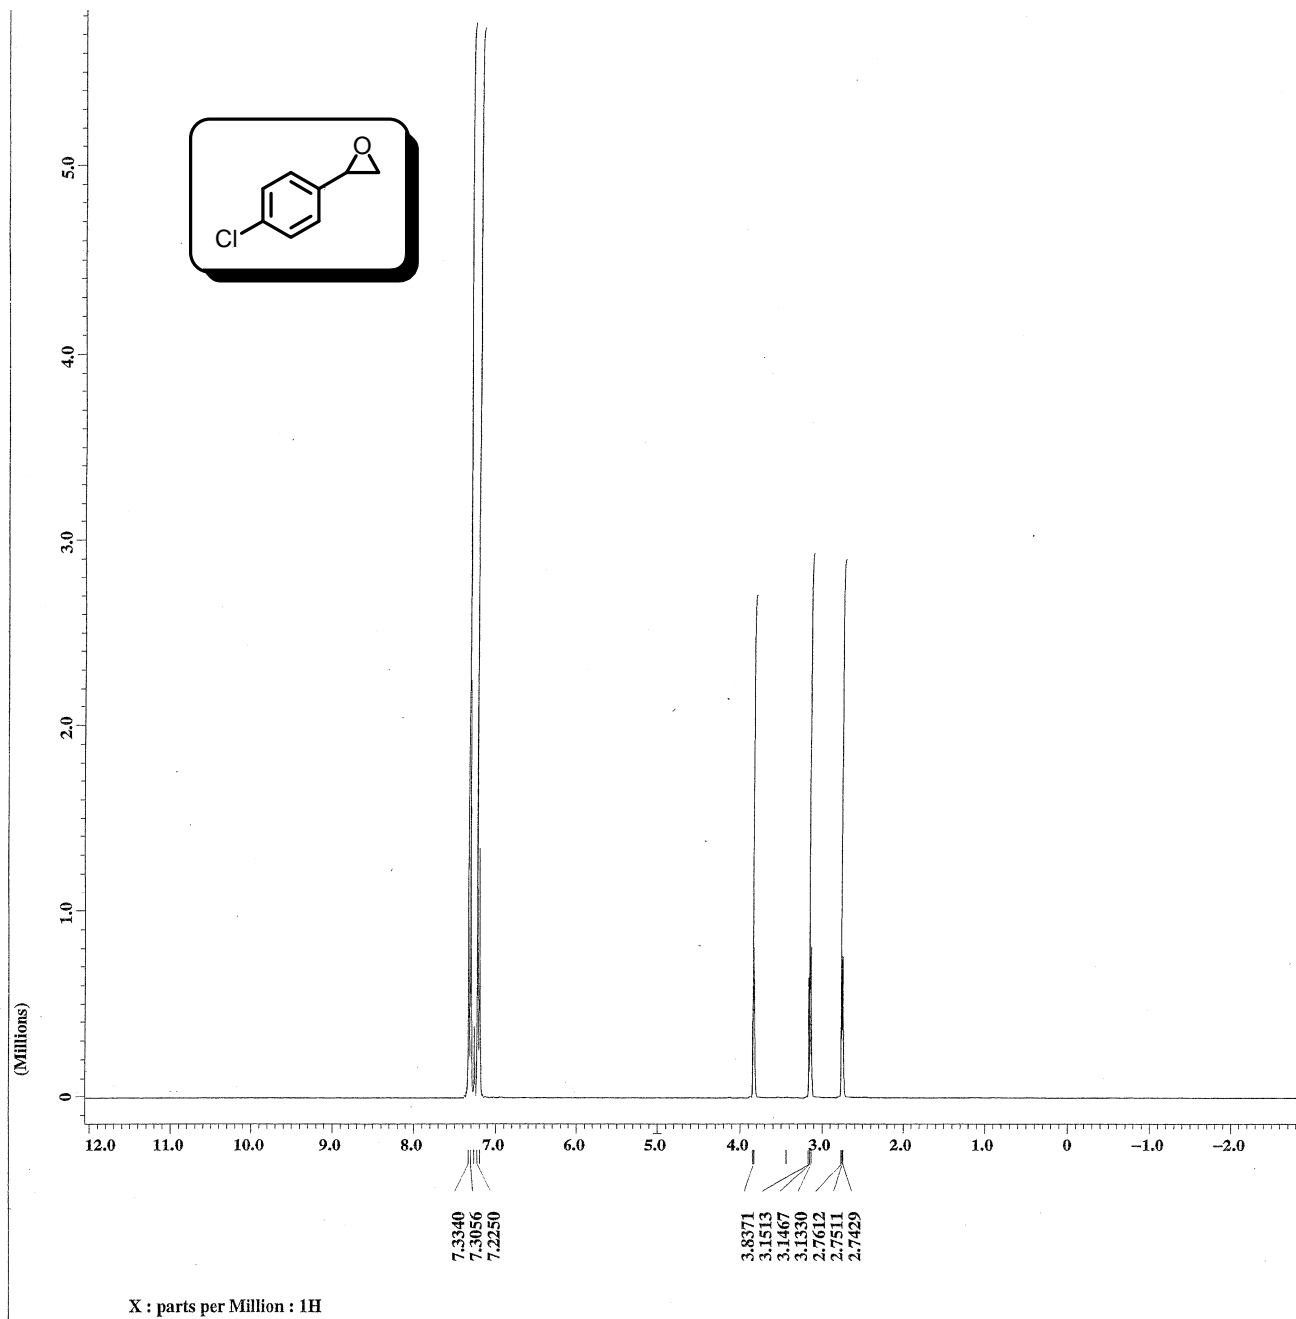

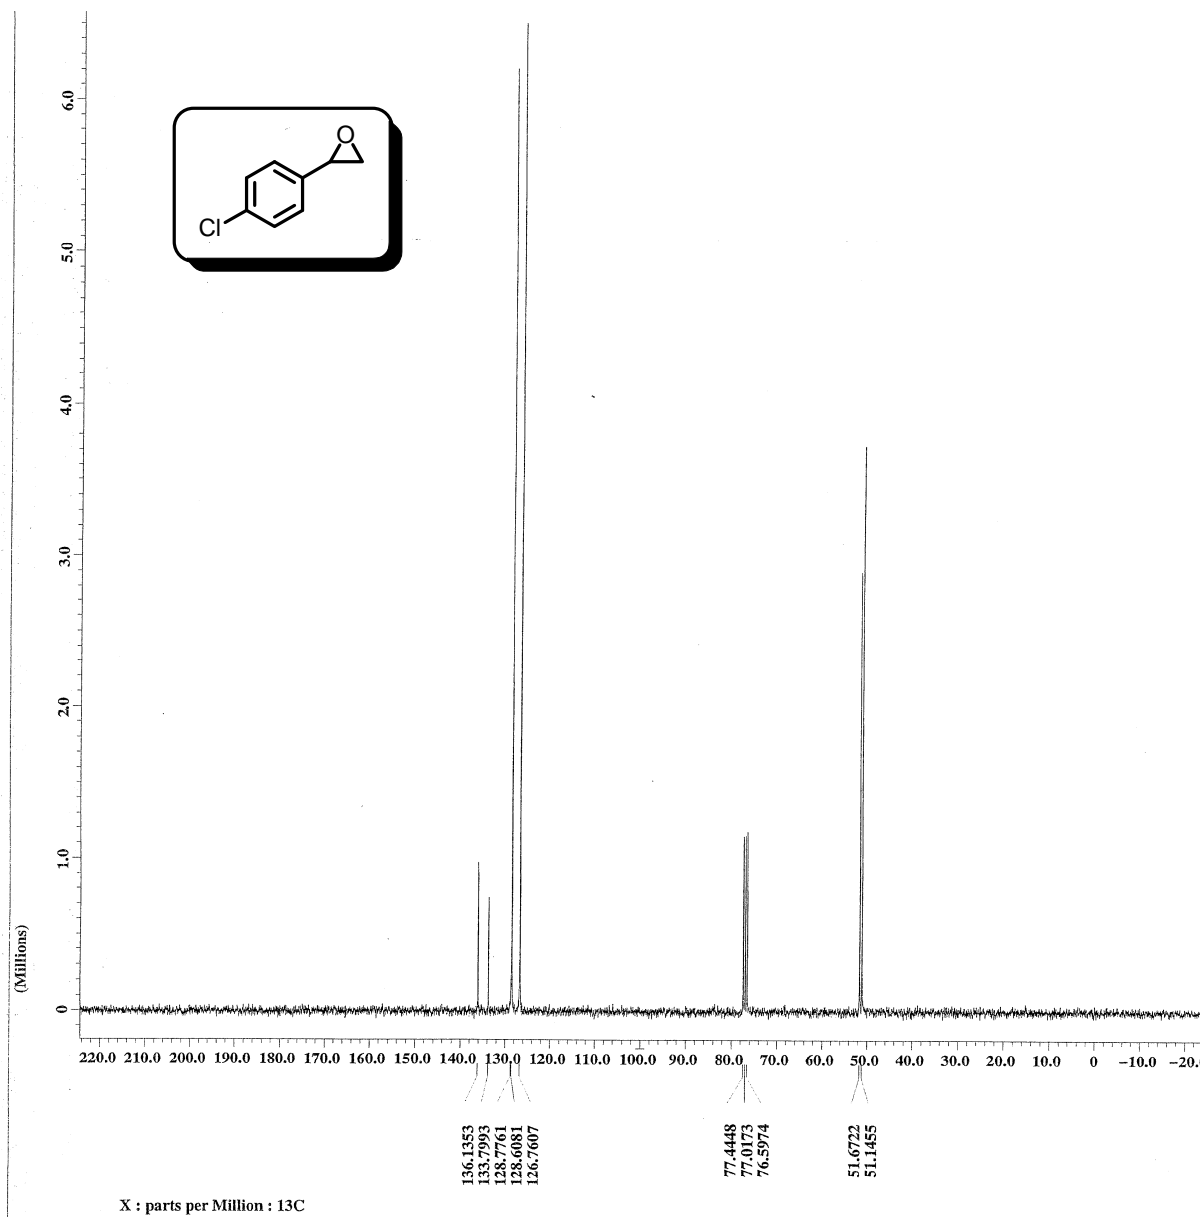

**2-(2,6-Dichlorophenyl)oxirane**

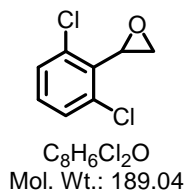

From the combination of 2,6-dichlorobenzaldehyde (0.175 g, 1.00 mmol), cesium carbonate (0.652 g, 2.00 mmol), and carboxymethylmethylphenylsulfonium trifluoromethanesulfonate (0.664 g, 2.00 mmol) in 5.0 mL of THF, 0.185 g (98% yield) of the title compound was isolated as a low melting solid after purification by column chromatography. Analytical data: IR ( $cm^{-1}$ ) 3000, 2926, 1583, 1430, 1264, 1090, 894, 778, 736;  $^1H$  NMR (300 MHz,  $CDCl_3$ )  $\delta$  7.31-7.20 (m, 3H), 3.96 (dd,  $J = 2.7$ ,  $J = 2.7$ , 1H), 3.27 (dd,  $J = 3.0$ ,  $J = 3.0$ , 1H), 3.01 (dd,  $J = 2.7$ ,  $J = 2.7$ , 1H),  $^{13}C$  NMR (75 MHz,  $CDCl_3$ )  $\delta$  136.1, 133.0, 129.9, 128.4, 50.2, 49.4; HRMS (EI) calculated mass 187.9796 ( $C_8H_6Cl_2O$ ), found: 187.9793; TLC  $R_f$  0.35 (EtOAc/hexane, 1/9); melting point 39-40 °C; GC (ZB-5)  $t_R$  9.28 min.

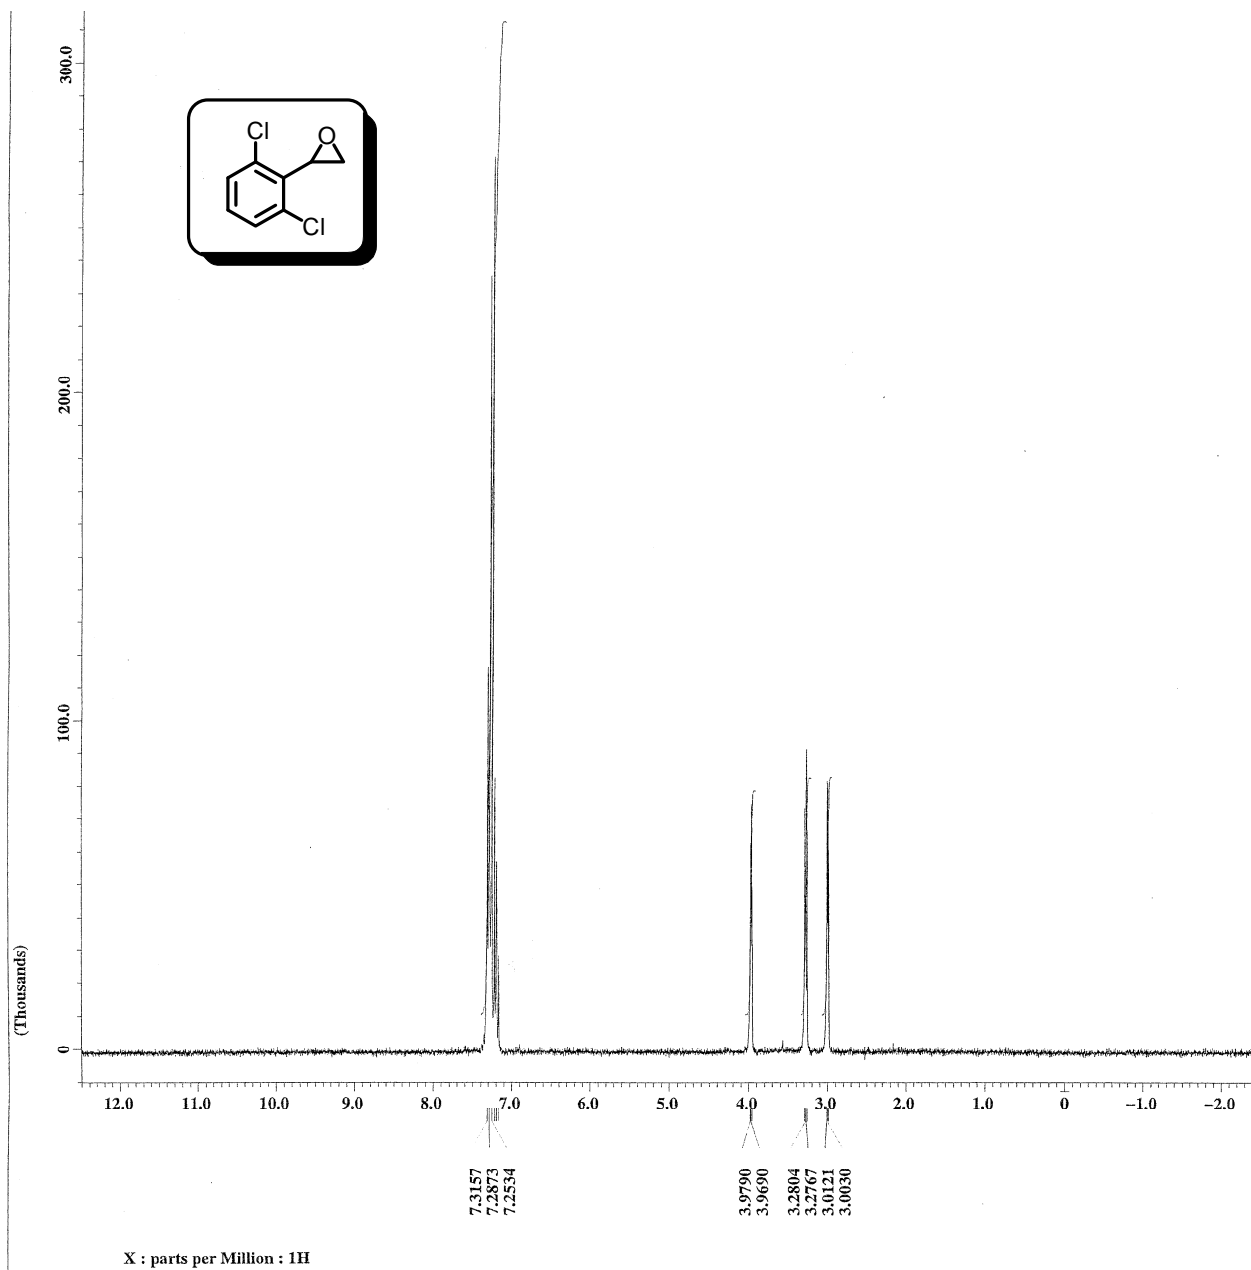



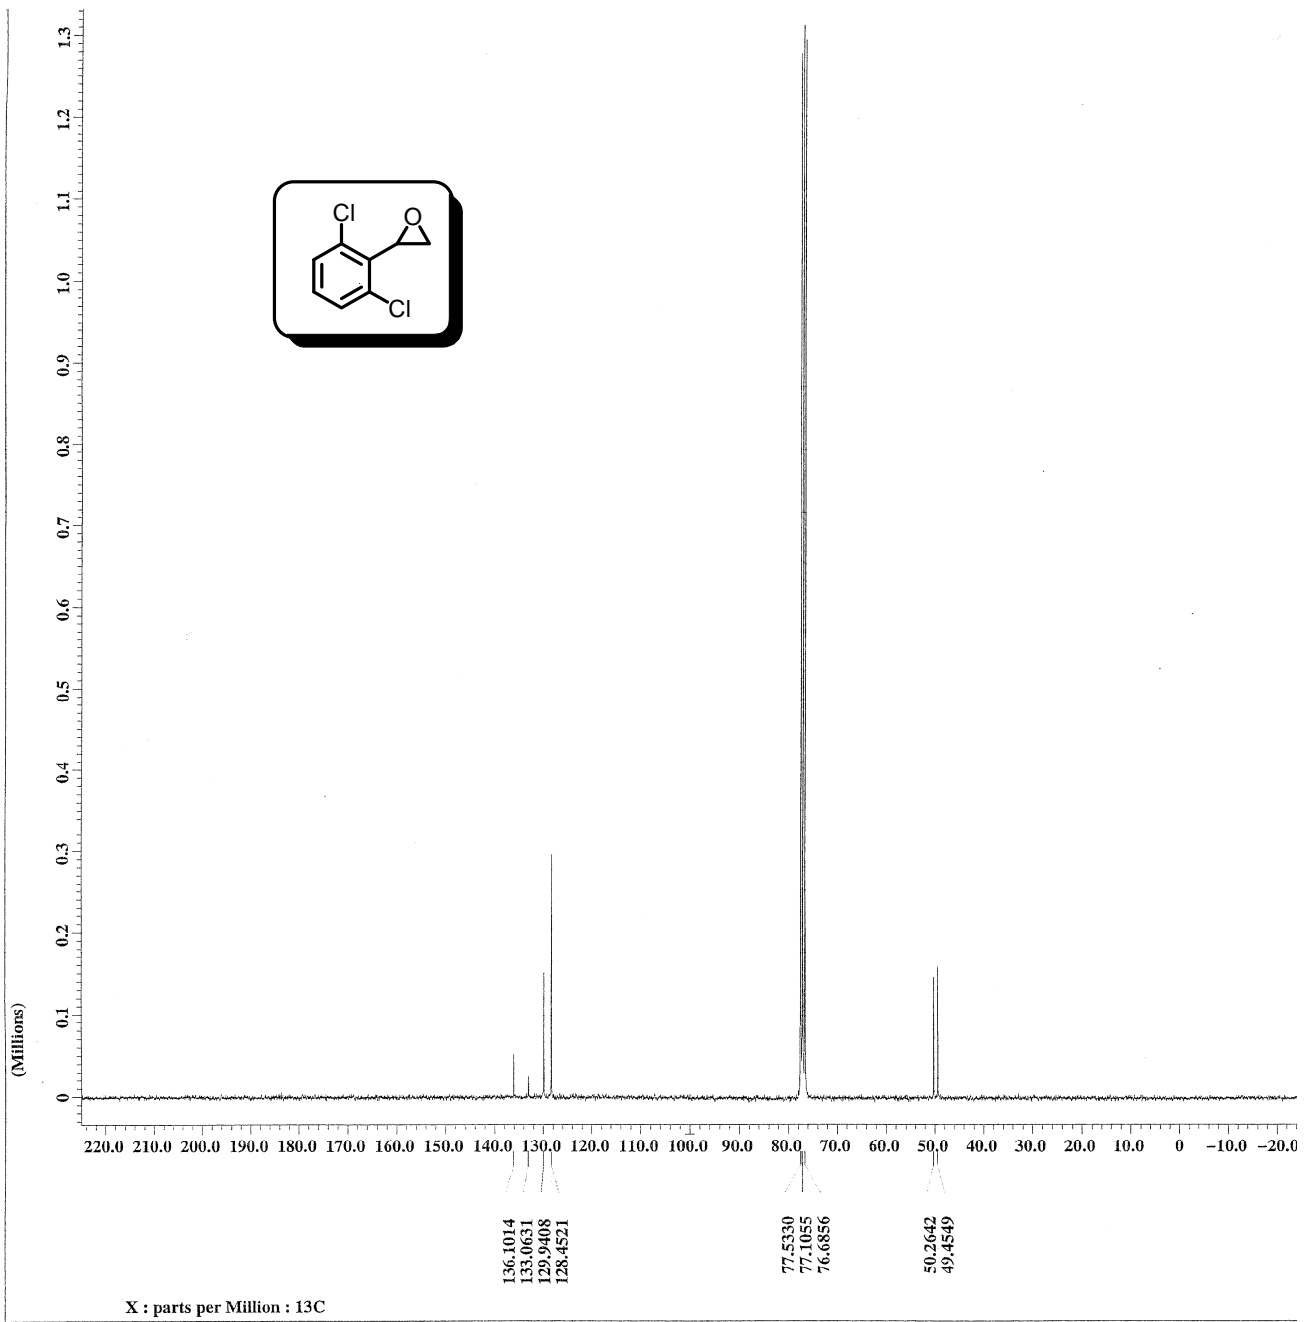

**2-(4-Methoxyphenyl)oxirane**

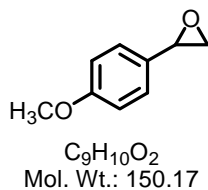

From the combination of 4-methoxybenzaldehyde (0.150 g, 1.00 mmol), cesium carbonate (0.652 g, 2.00 mmol), and carboxymethylmethylphenylsulfonium trifluoromethanesulfonate (0.664 g, 2.00 mmol) in 5.0 mL of THF, 0.129 g (86% yield) of the title compound was isolated as an oil after purification by column chromatography. Analytical data: <sup>1</sup>H NMR (300 MHz, CDCl<sub>3</sub>) δ 7.19 (d, *J* = 8.2, 2H), 6.80 (d, *J* = 8.2, 2H), 3.82-3.79 (m, 4H), 3.10 (dd, *J* = 4.1, *J* = 4.1, 1H), 2.79 (dd, *J* = 2.7, *J* = 2.7, 1H), <sup>13</sup>C NMR (75 MHz, CDCl<sub>3</sub>) δ 159.6, 129.4, 126.8, 113.9, 55.2, 52.2, 50.9; TLC R<sub>f</sub> 0.38 (EtOAc/hexane, 1/9). The analytical data obtained is consistent with commercial and previously reported material.<sup>4</sup>

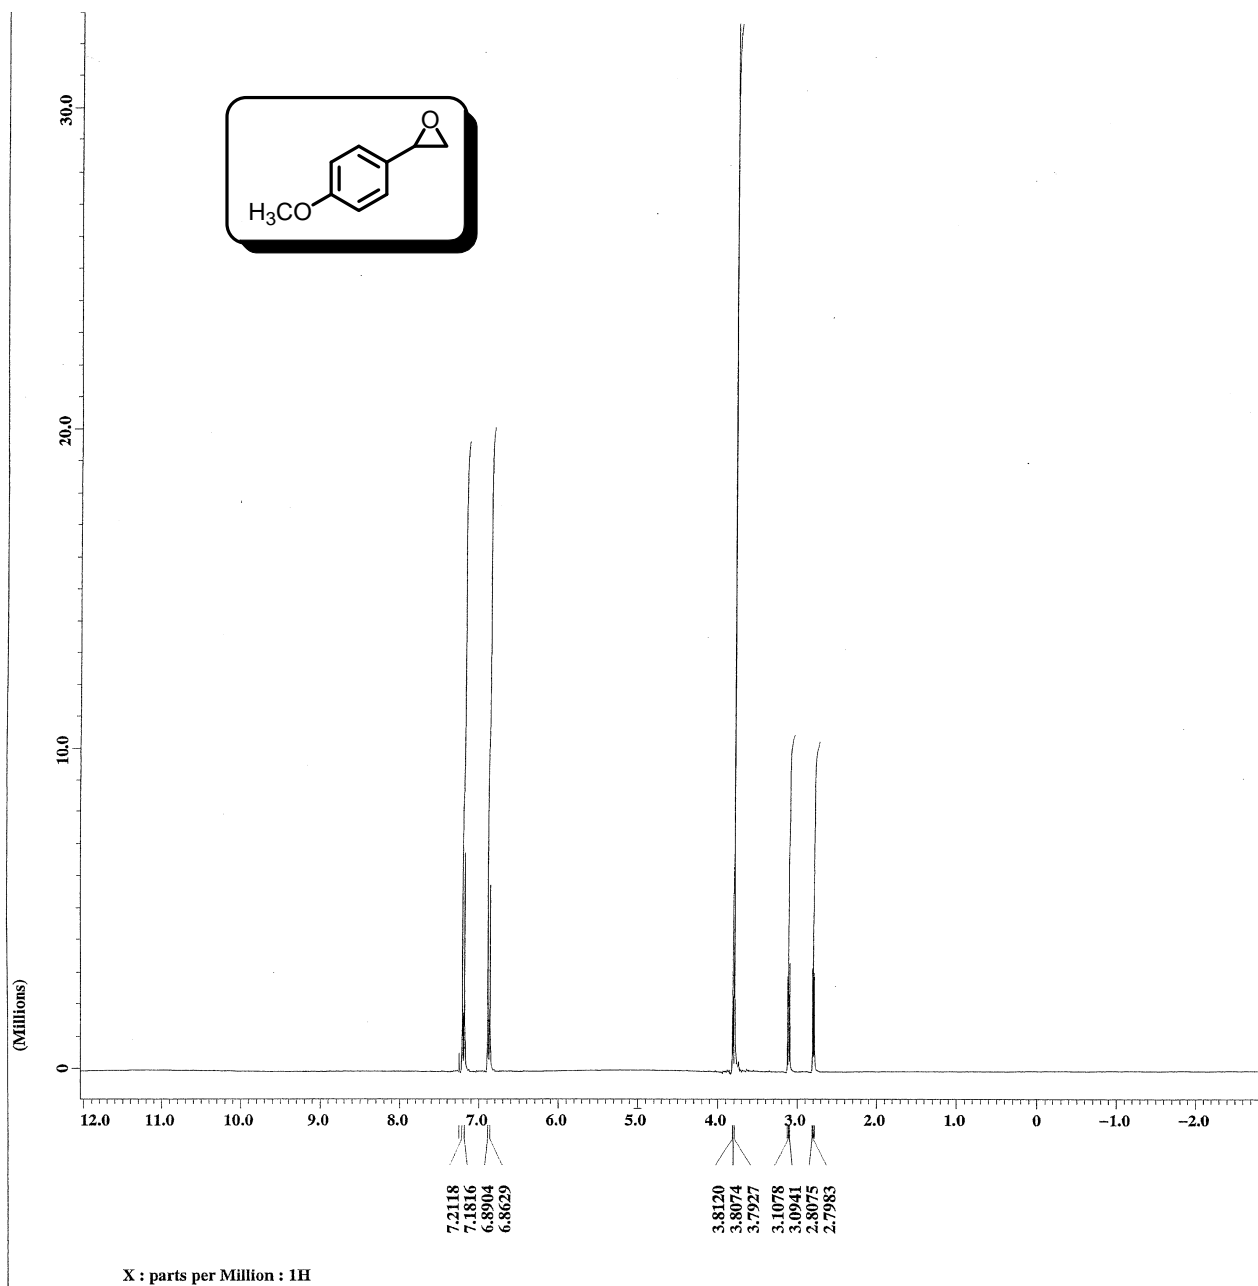

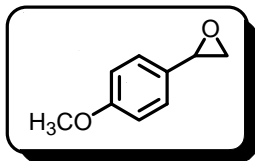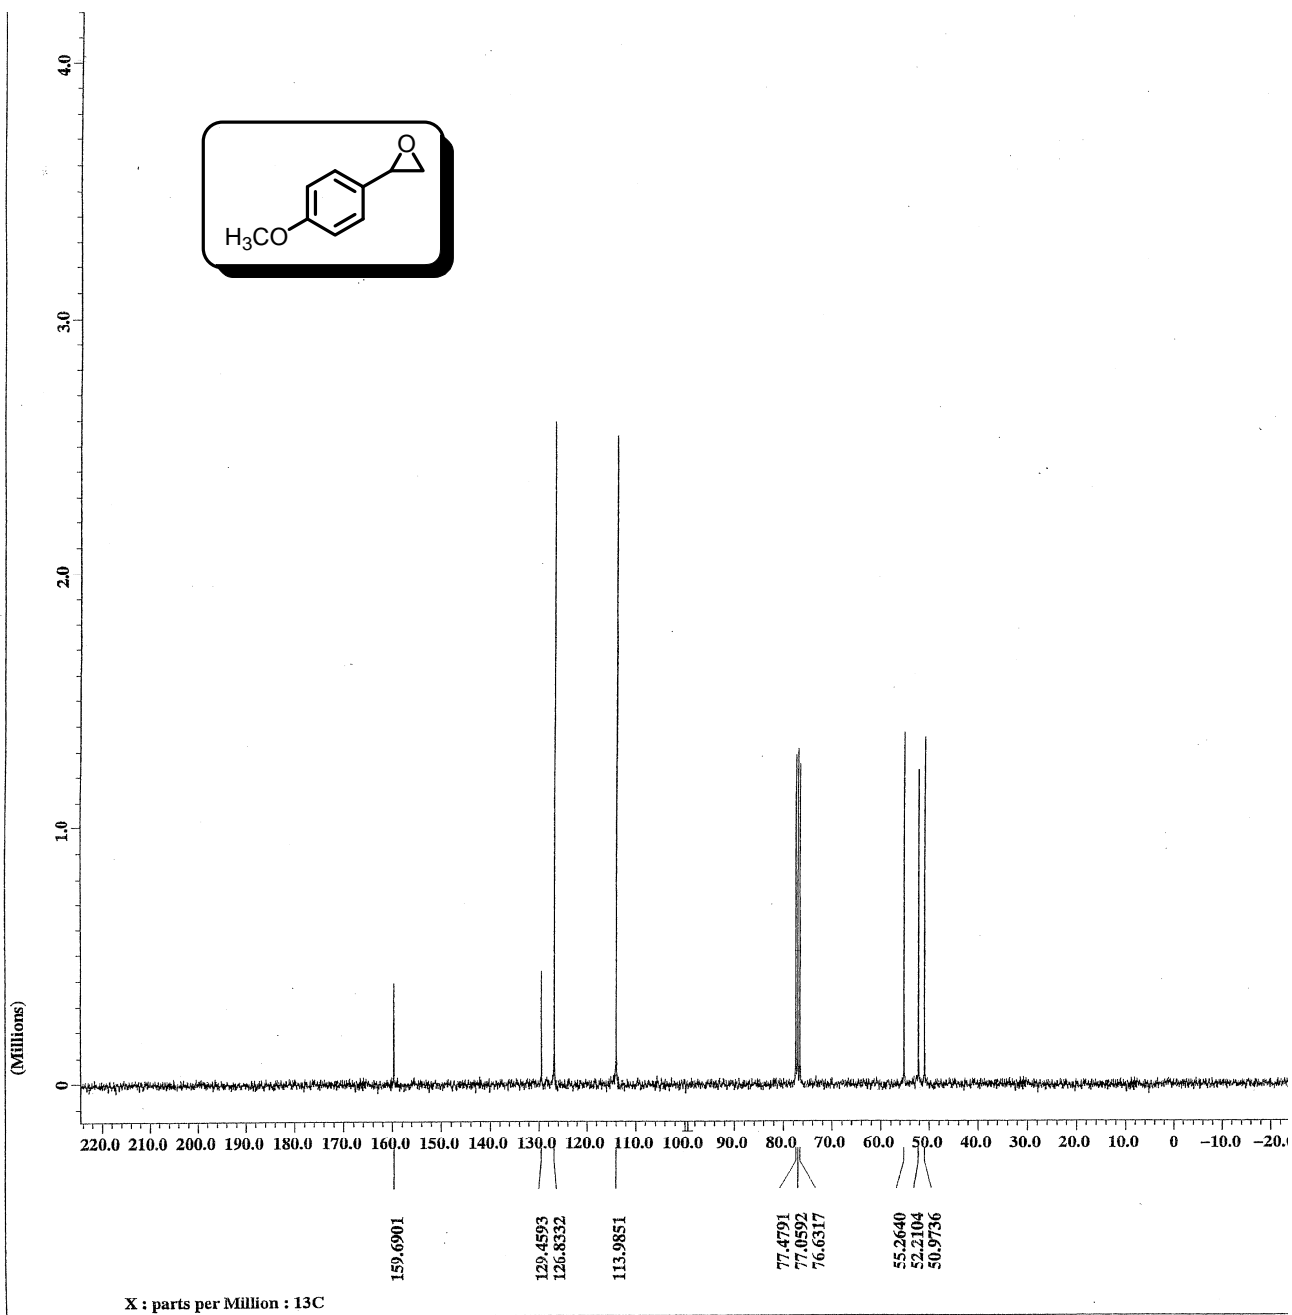

***2-(3,4-Methylenedioxyphenyl)oxirane***

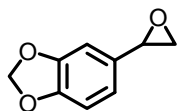

C<sub>9</sub>H<sub>8</sub>O<sub>3</sub>  
Mol. Wt.: 164.16

From the combination of 3,4-methylenedioxybenzaldehyde (0.150 g, 1.00 mmol), cesium carbonate (0.652 g, 2.00 mmol), and carboxymethylmethylphenylsulfonium trifluoromethanesulfonate (0.664 g, 2.00 mmol) in 5.0 mL of THF, 0.150 g (92% yield) of the title compound was isolated as an oil after purification by column chromatography. Analytical data: IR (cm<sup>-1</sup>) 2906, 1607, 1502, 1440, 1241, 1096, 1034; <sup>1</sup>H NMR (300 MHz, CDCl<sub>3</sub>) δ 6.79-6.69 (m, 3H), 5.94 (d, *J* = 1.6, 2H), 3.78 (dd, *J* = 2.4, *J* = 2.4, 1H), 3.09 (dd, *J* = 3.8, *J* = 3.8, 1H), 2.74 (dd, *J* = 2.4, *J* = 2.4, 1H); <sup>13</sup>C NMR (75 MHz, CDCl<sub>3</sub>) δ 148.1, 147.7, 131.5, 119.7, 108.3, 105.4, 101.2, 52.4, 51.1; HRMS (EI). Calculated mass 164.0472 (C<sub>9</sub>H<sub>8</sub>O<sub>3</sub>), found: 164.0474; TLC R<sub>f</sub> 0.36 (EtOAc/hexane, 1/9); GC (ZB-5) *t*<sub>R</sub> 7.26 min. The analytical data obtained is consistent with commercial material.

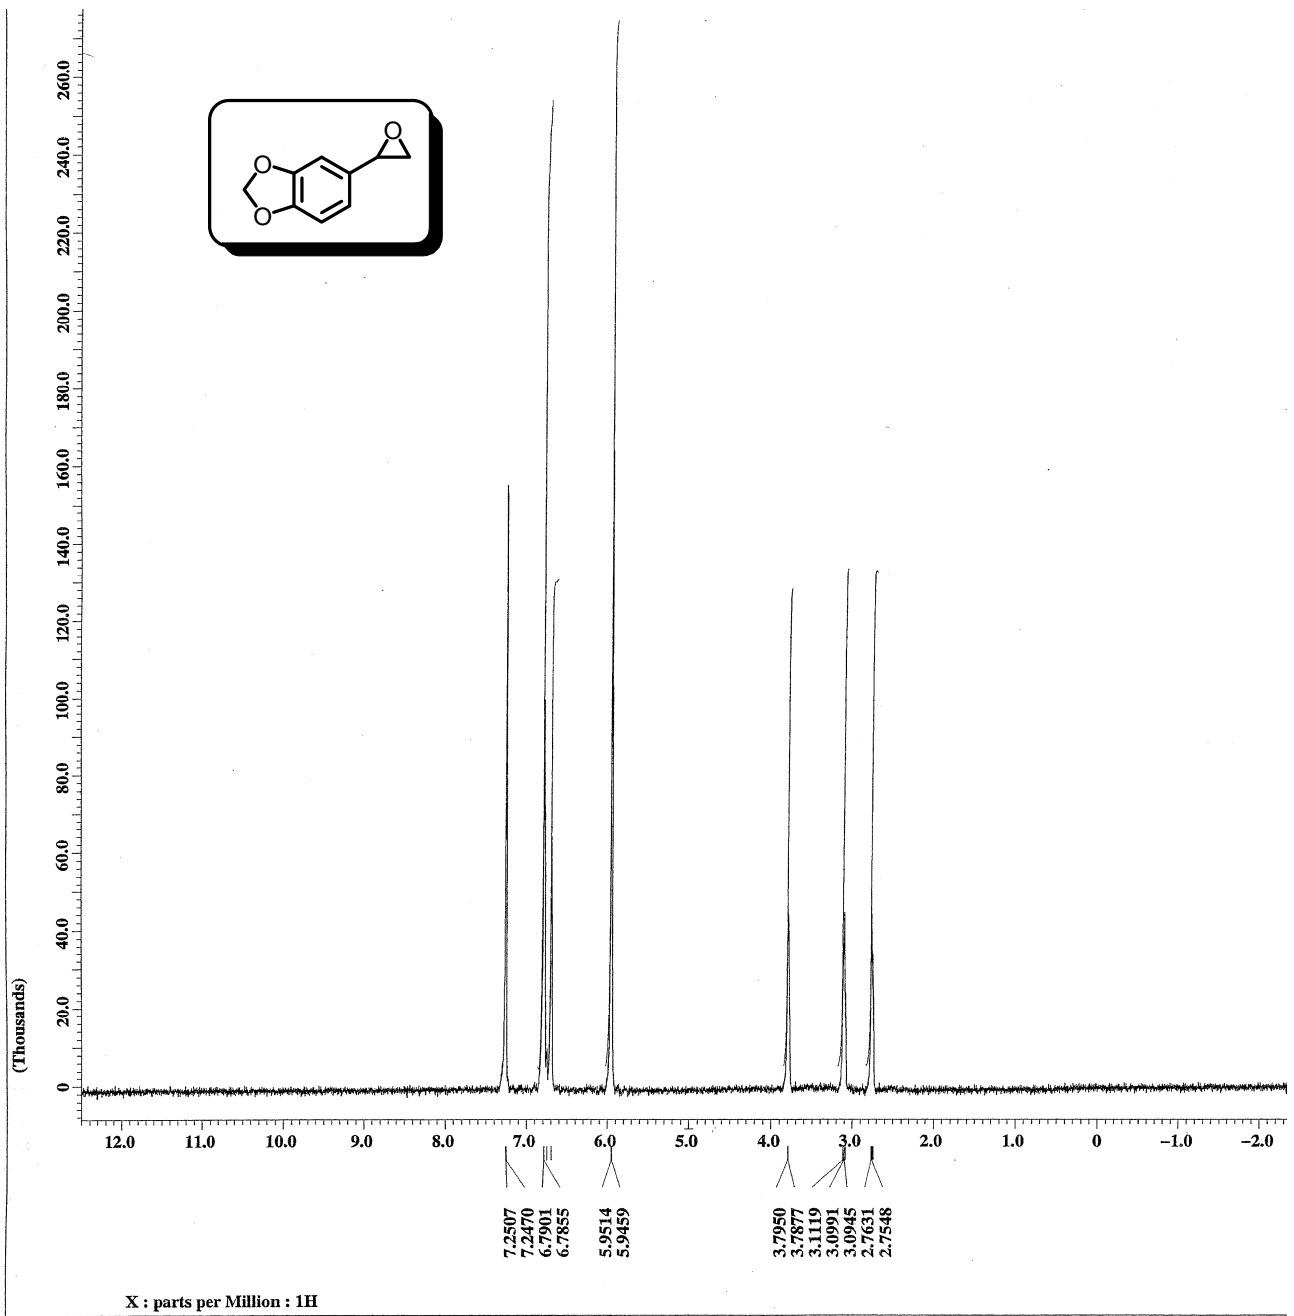

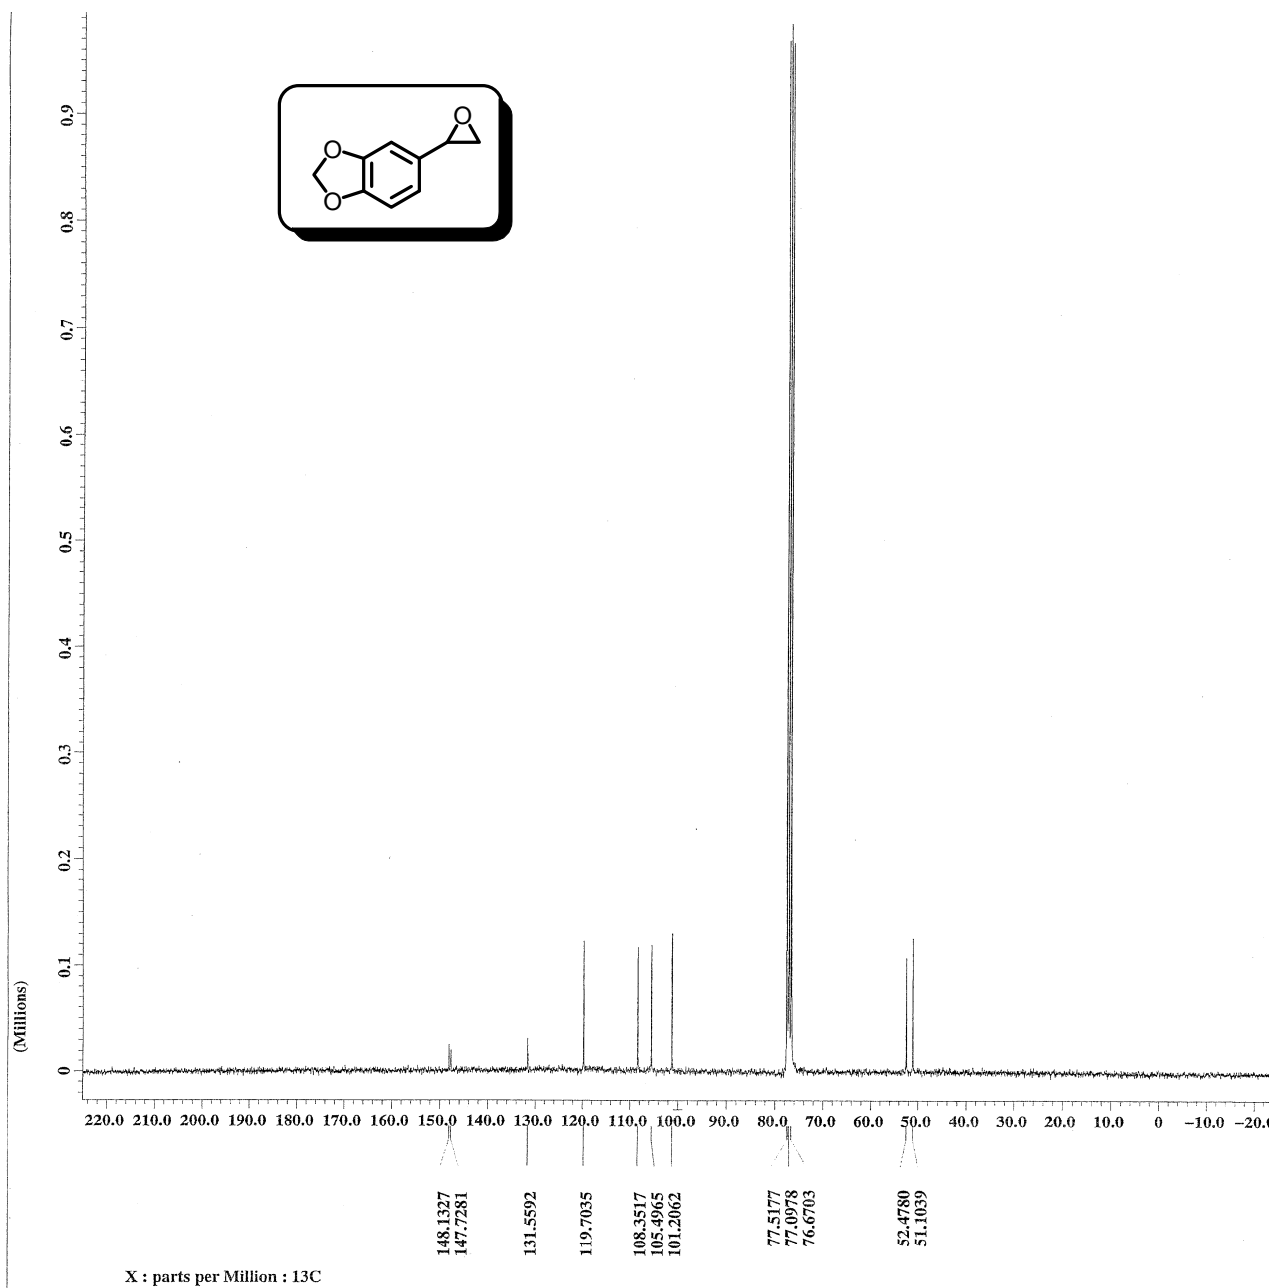

***2-(3-Bromo-4-methoxyphenyl)oxirane***

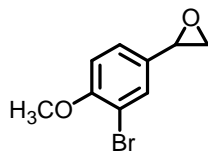

$C_9H_9BrO_2$   
Mol. Wt.: 229.07

From the combination of 3-bromo-4-methoxybenzaldehyde (1.374 g, 6.00 mmol), cesium carbonate (3.912 g, 12.00 mmol), and carboxymethylmethylphenylsulfonium trifluoromethanesulfonate (3.984 g, 12.00 mmol) in 30.0 mL of THF, 1.20 g (93% yield) of the title compound was isolated as an oil after purification by column chromatography. Analytical data: IR ( $cm^{-1}$ ) 3045, 2989, 1603, 1439, 1261, 1051, 726, 673;  $^1H$  NMR (300 MHz,  $CDCl_3$ )  $\delta$  7.43 (d,  $J = 8.4$ , 2H), 7.25-7.17 (m, 1H), 6.86 (d,  $J = 8.4$ , 1H), 3.88 (s, 3H), 3.78 (dd,  $J = 2.7$ ,  $J = 2.7$ , 1H), 3.11 (dd,  $J = 4.1$ ,  $J = 4.1$ , 1H), 2.76 (dd,  $J = 2.7$ ,  $J = 2.7$ , 1H),  $^{13}C$  NMR (75 MHz,  $CDCl_3$ )  $\delta$  155.9, 131.2, 130.5, 125.9, 111.9, 56.4, 51.5, 51.1; HRMS (ESI) calculated mass 228.9858 ( $C_9H_9BrO_2$ ); found, 228.9864; TLC  $R_f$  0.35 (EtOAc/hexane, 1/9); GC (ZB-5)  $t_R$  11.23 min.



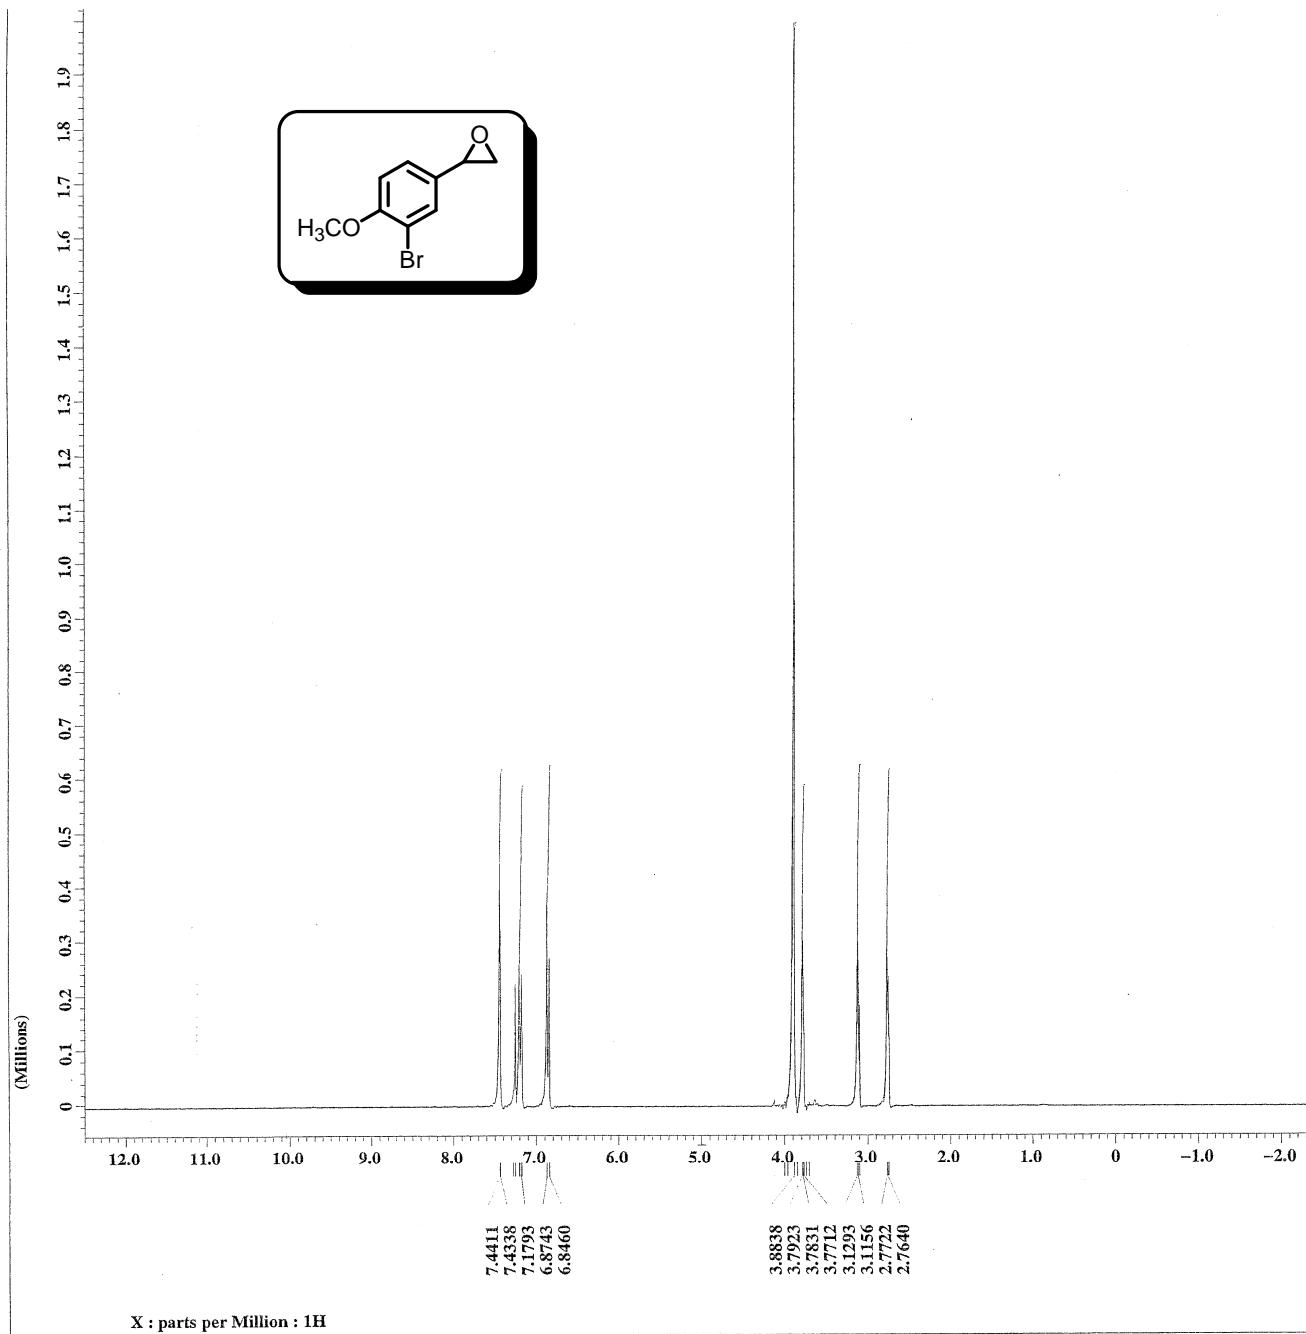

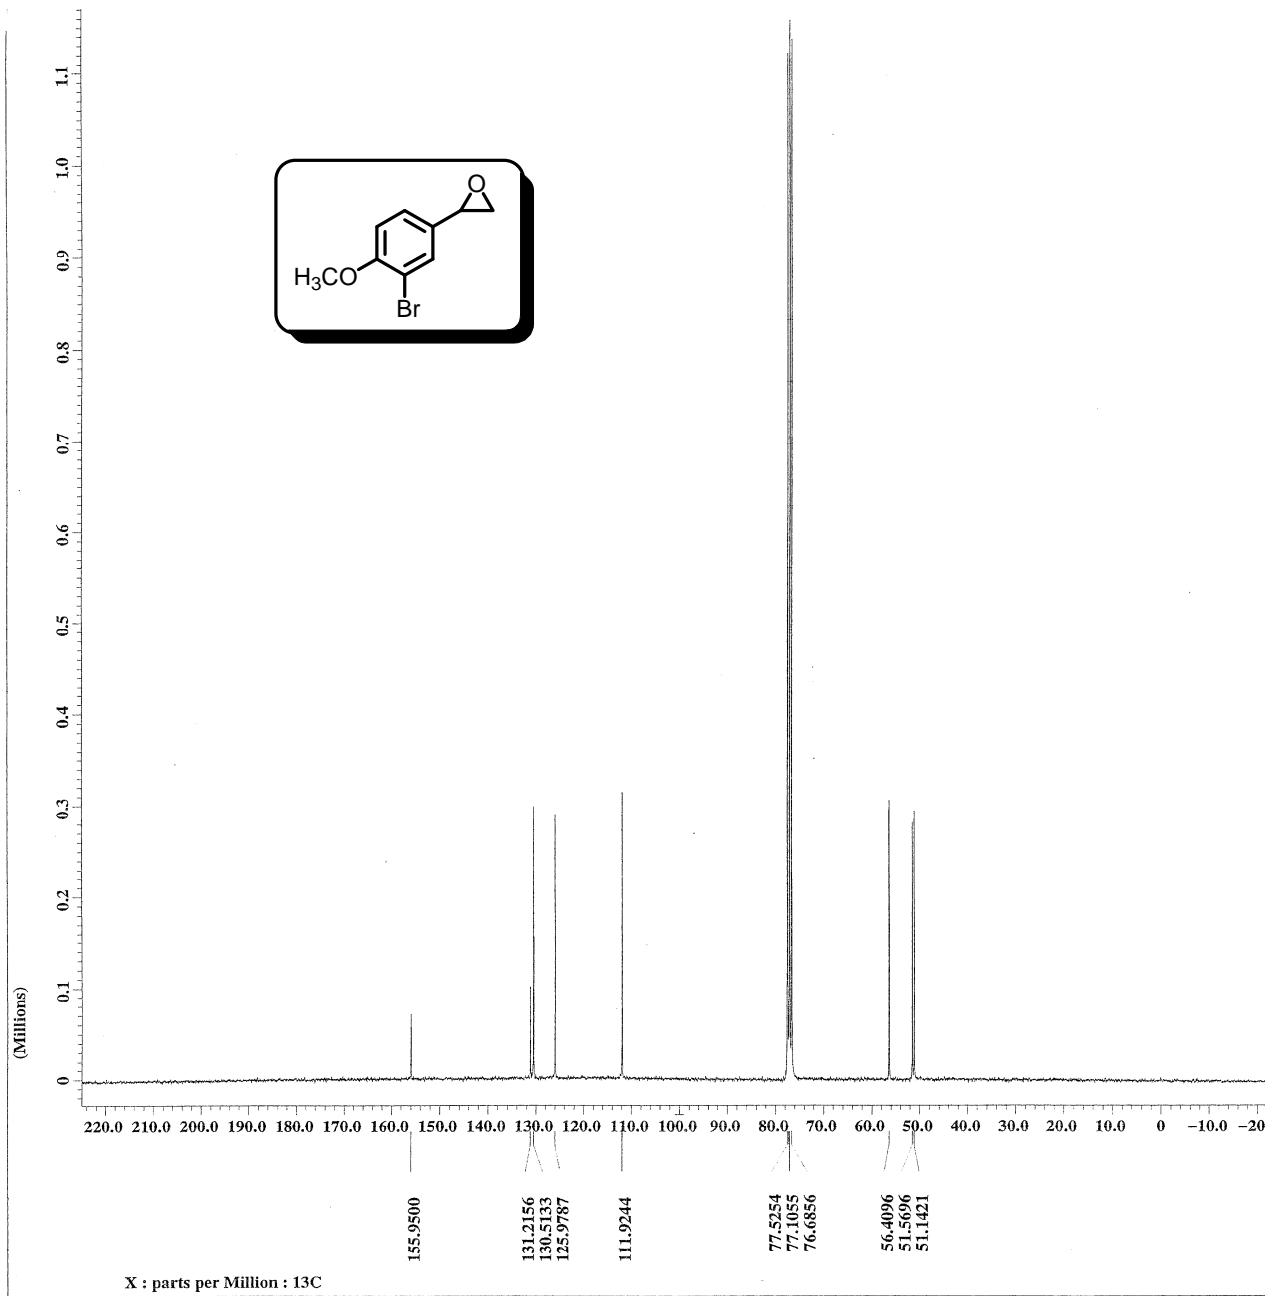

**2-(3,4,5-Trimethoxyphenyl)oxirane**

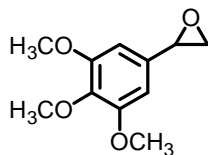

C<sub>11</sub>H<sub>14</sub>O<sub>4</sub>  
Mol. Wt.: 210.23

From the combination of 3,4,5-trimethoxybenzaldehyde (1.960 g, 10.00 mmol), cesium carbonate (6.520 g, 20.00 mmol), and carboxymethylmethylphenylsulfonium trifluoromethanesulfonate (6.640 g, 20.00 mmol) in 50 mL of THF, 1.91 g (91% yield) of the title compound was isolated as an oil after purification by column chromatography. Analytical data: <sup>1</sup>H NMR (300 MHz, CDCl<sub>3</sub>) δ 6.52 (s, 2H), 3.84-3.78 (m, 10H), 3.14 (dd, *J* = 4.1, *J* = 4.1, 1H), 2.77 (dd, *J* = 2.7, *J* = 2.7, 1H), <sup>13</sup>C NMR (75 MHz, CDCl<sub>3</sub>) δ 153.5, 139.0, 137.7, 133.2, 106.5, 102.1, 60.8, 56.0, 52.5, 51.1; TLC R<sub>f</sub> 0.33 (EtOAc/hexane, 1/9). The analytical data obtained is consistent with previously reported material.<sup>5</sup>

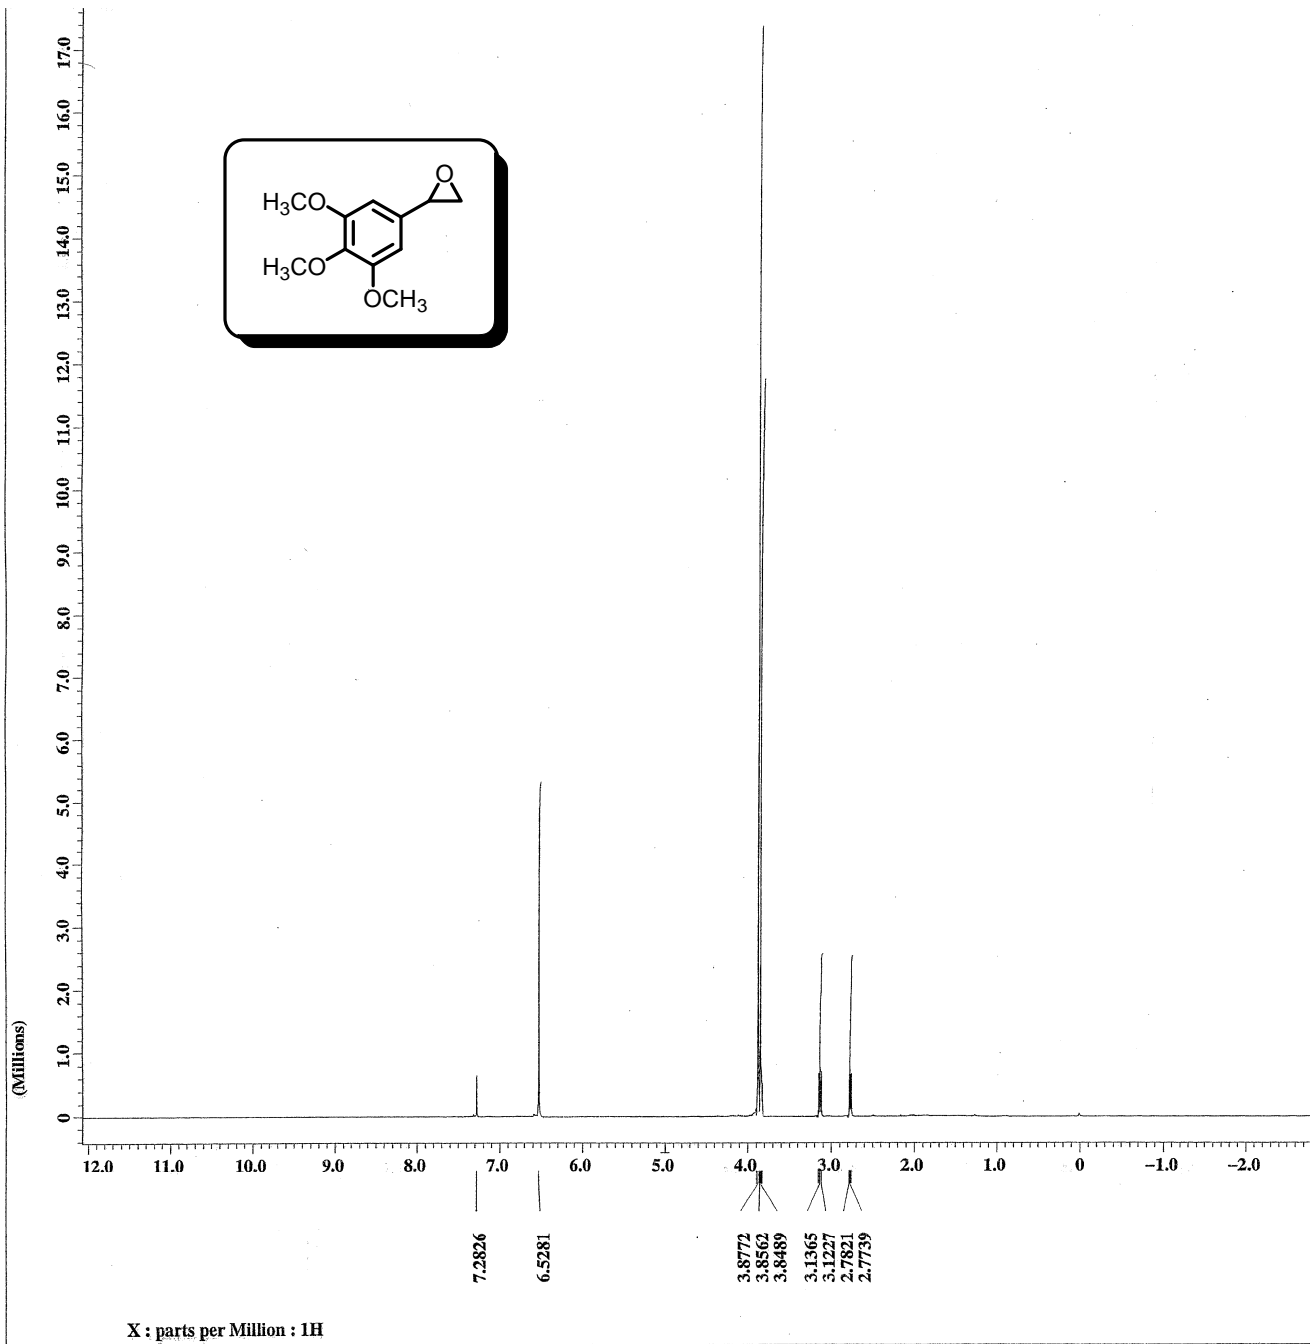

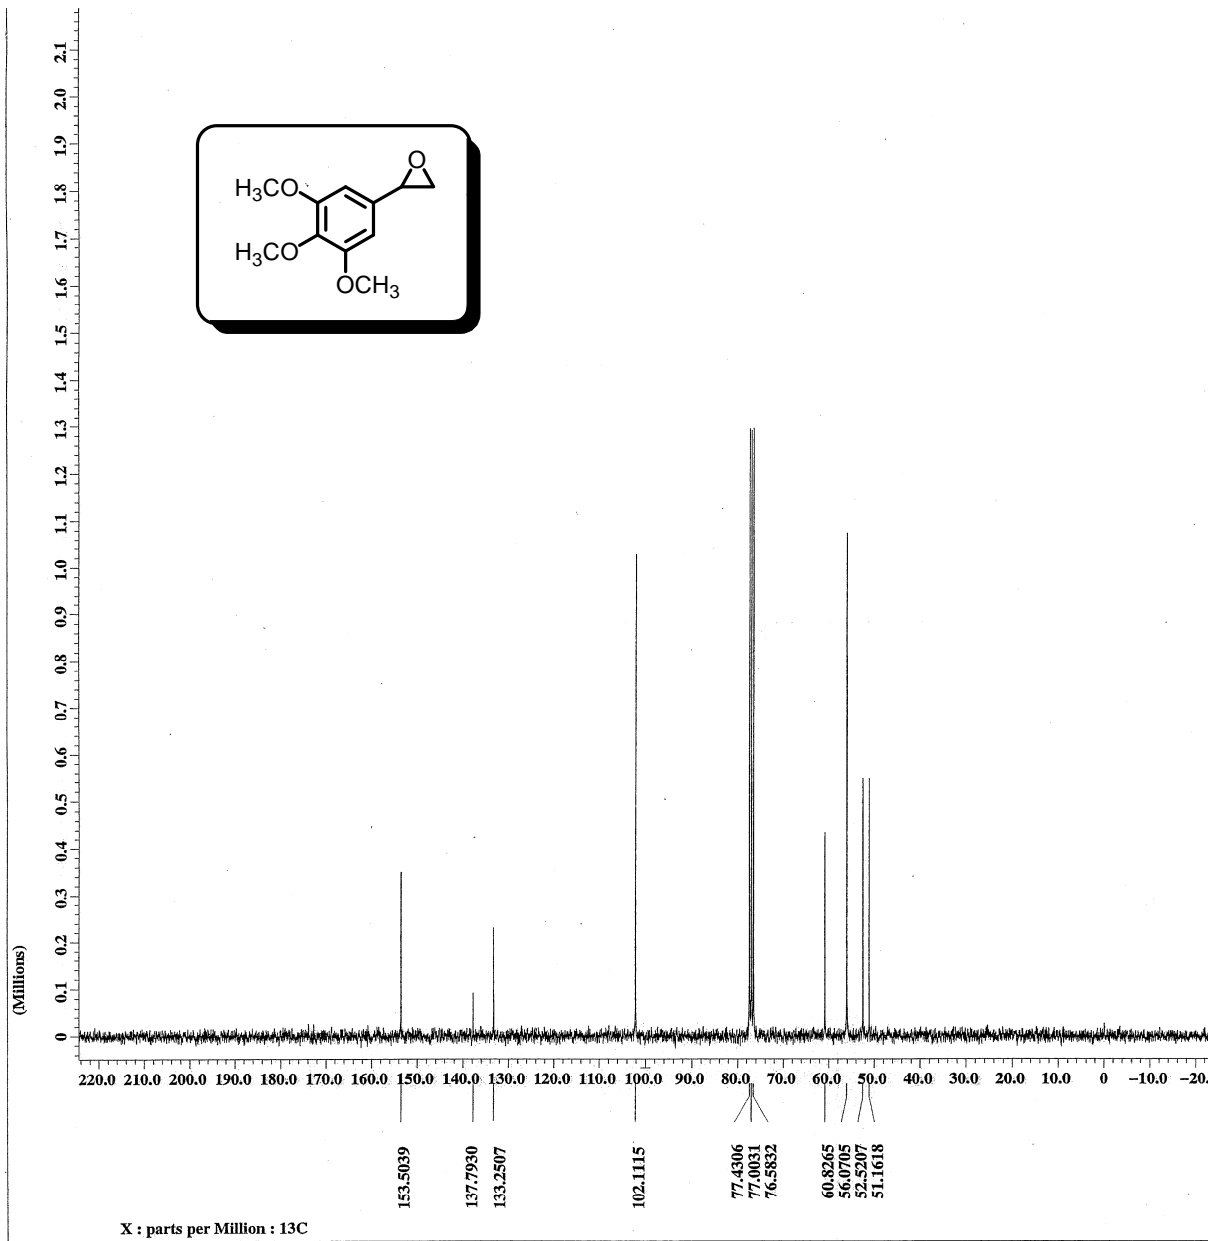

### 1,2-Epoxytridecane

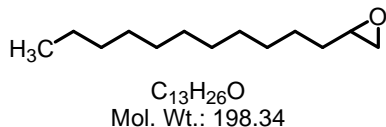

From the combination of dodecylaldehyde (0.184 g, 1.00 mmol), cesium carbonate (0.652 g, 2.00 mmol), and carboxymethylmethylphenylsulfonium trifluoromethanesulfonate (0.664 g, 2.00 mmol) in 5 mL of tetrahydrofuran, 0.174 g (95% yield) of the title compound was isolated as an oil after purification by column chromatography. Analytical data: <sup>1</sup>H NMR (300 MHz, CDCl<sub>3</sub>) δ 2.93-2.87 (m, 1H), 2.74 (dd, *J* = 4.9, *J* = 4.9, 1H), 2.46 (dd, *J* = 2.7, *J* = 2.7, 1H), 1.66-1.41 (m, 20H), 0.88 (t, *J* = 6.8, 1H), <sup>13</sup>C NMR (75 MHz, CDCl<sub>3</sub>) δ 52.9, 47.6, 32.4, 30.16, 30.0, 29.9, 29.8, 29.6, 26.5, 23.2, 16.36, 14.6.; TLC R<sub>f</sub> 0.43 (EtOAc/hexane, 1/9). The analytical data obtained is consistent with previously reported material.<sup>6</sup>

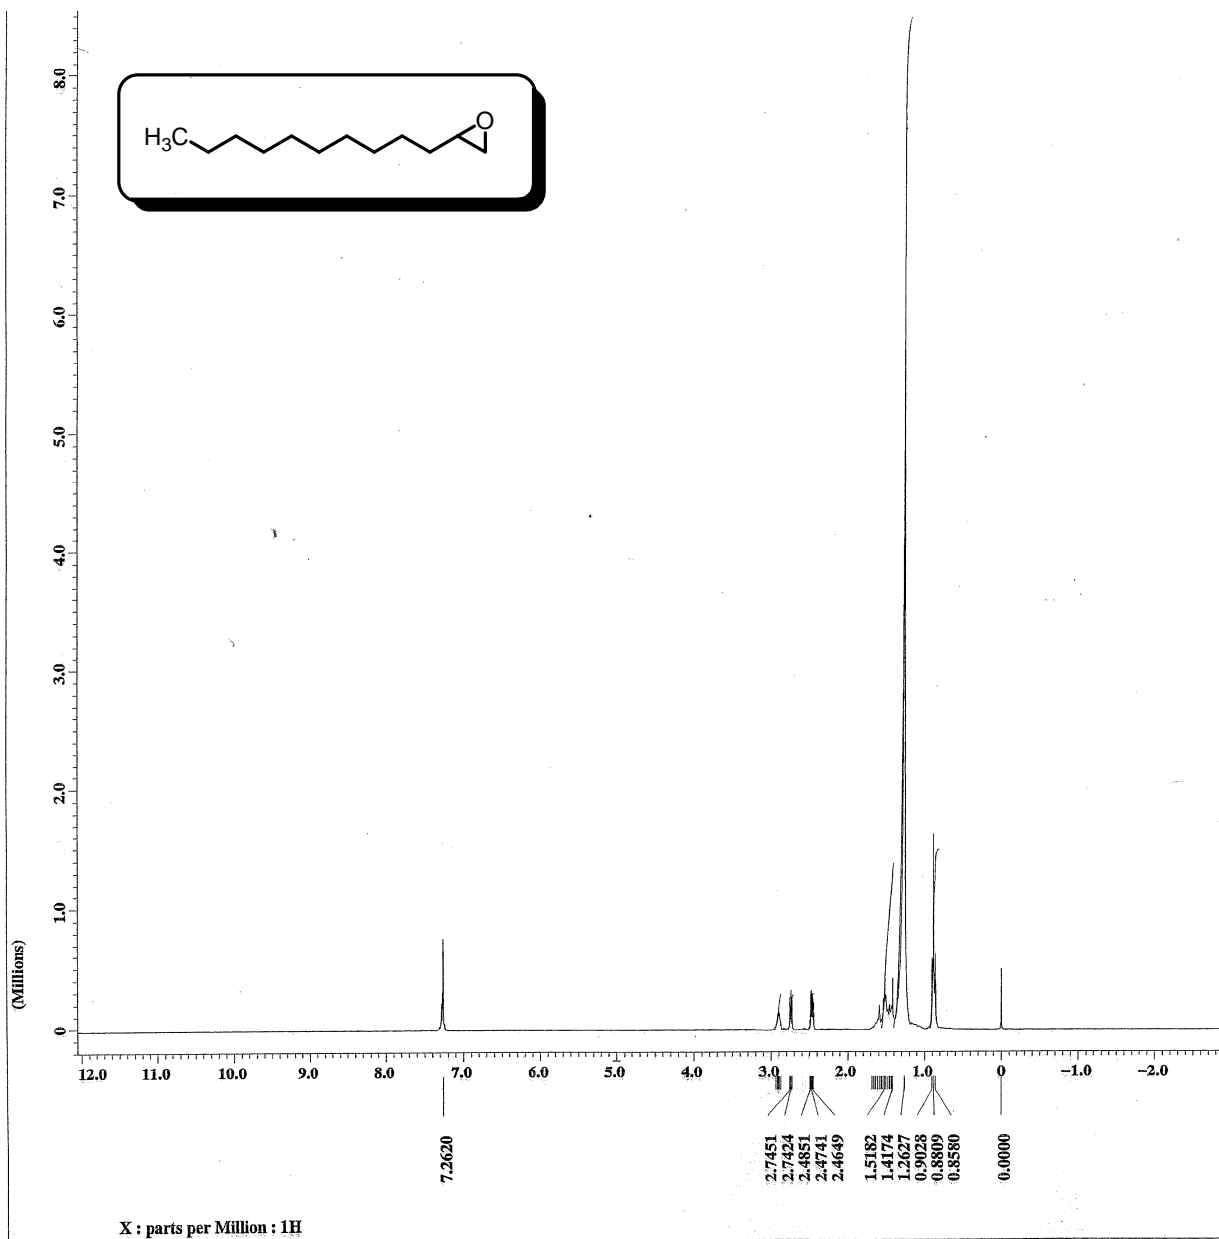

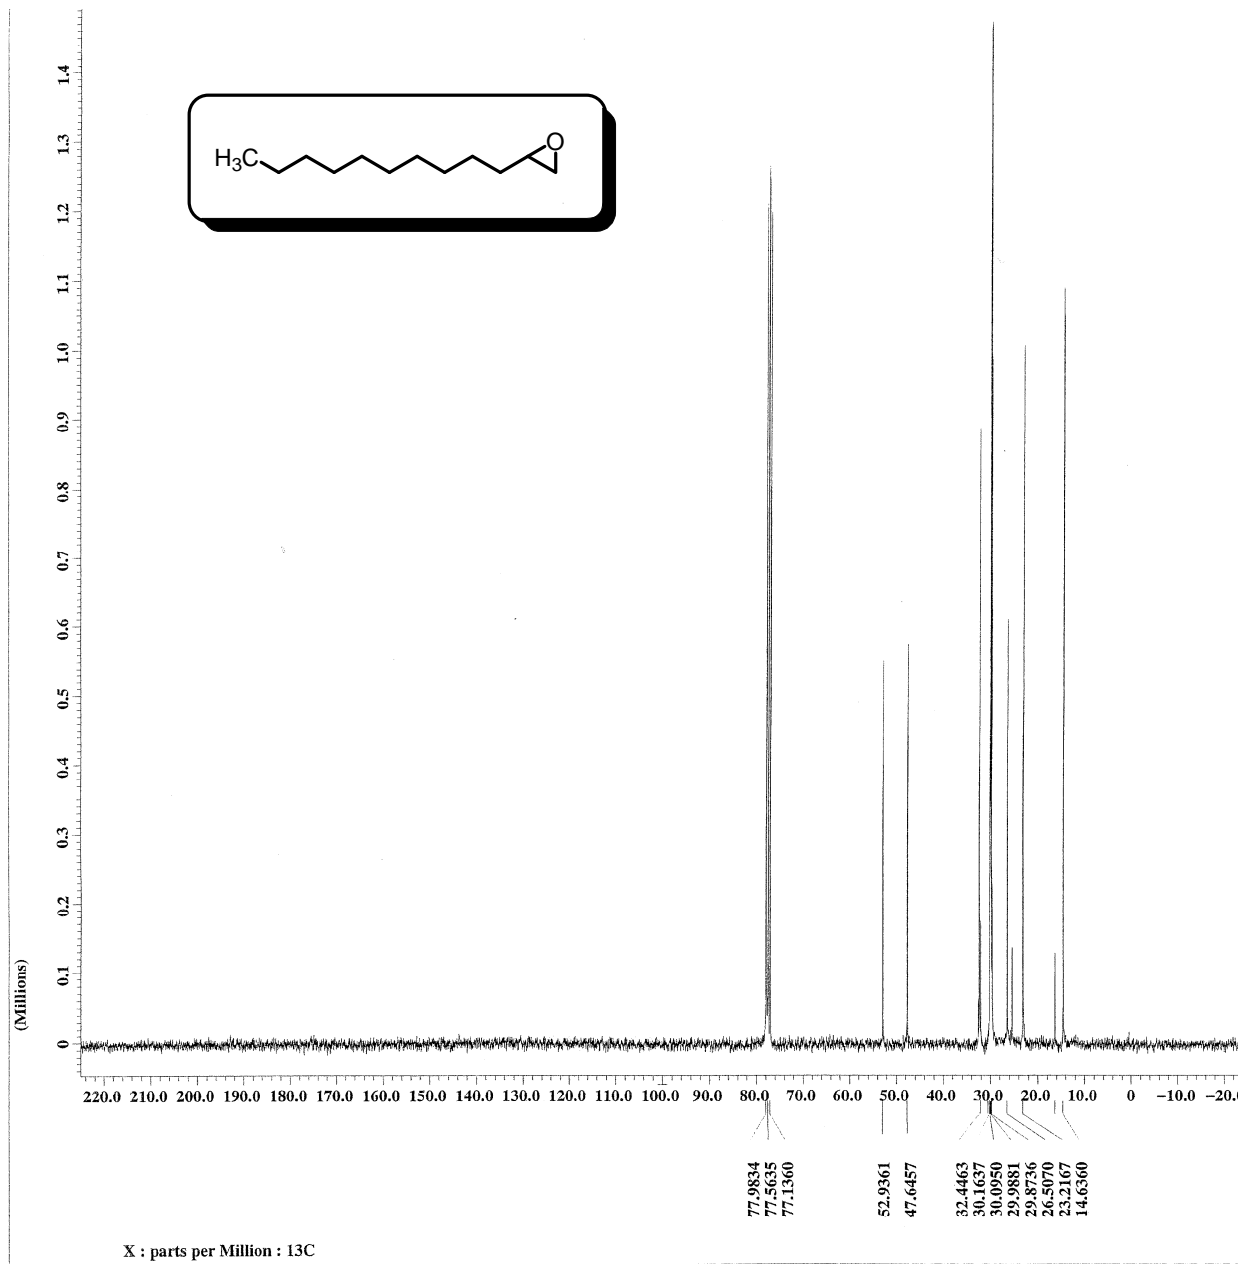



## 2-Methyl-2-phenyloxirane

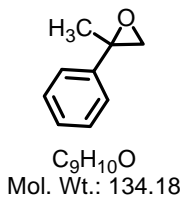

From the combination of acetophenone (0.120 g, 1.00 mmol), cesium carbonate (0.652 g, 2.00 mmol), and carboxymethylmethylphenylsulfonium trifluoromethanesulfonate (0.664 g, 2.00 mmol) in 5 mL of tetrahydrofuran, 0.103 g (86% yield) of the title compound was isolated as an oil after purification by column chromatography. Analytical data: <sup>1</sup>H NMR (300 MHz, CDCl<sub>3</sub>) δ 7.95 (d, *J* = 7.1, 2H), 7.55 (t, *J* = 7.6, 1H), 7.45 (t, *J* = 7.6, 2H), 2.96 (d, *J* = 5.4, 1H), 2.79 (d, *J* = 5.4, 1H), 1.71 (s, 3H) <sup>13</sup>C NMR (75 MHz, CDCl<sub>3</sub>) δ 52.9, 47.6, 32.4, 30.16, 30.0, 29.9, 29.8, 29.6, 26.5, 23.2, 16.36, 14.6; TLC R<sub>f</sub> 0.43 (EtOAc/hexane, 1/9); The analytical data obtained is consistent with previously reported material.<sup>6</sup>

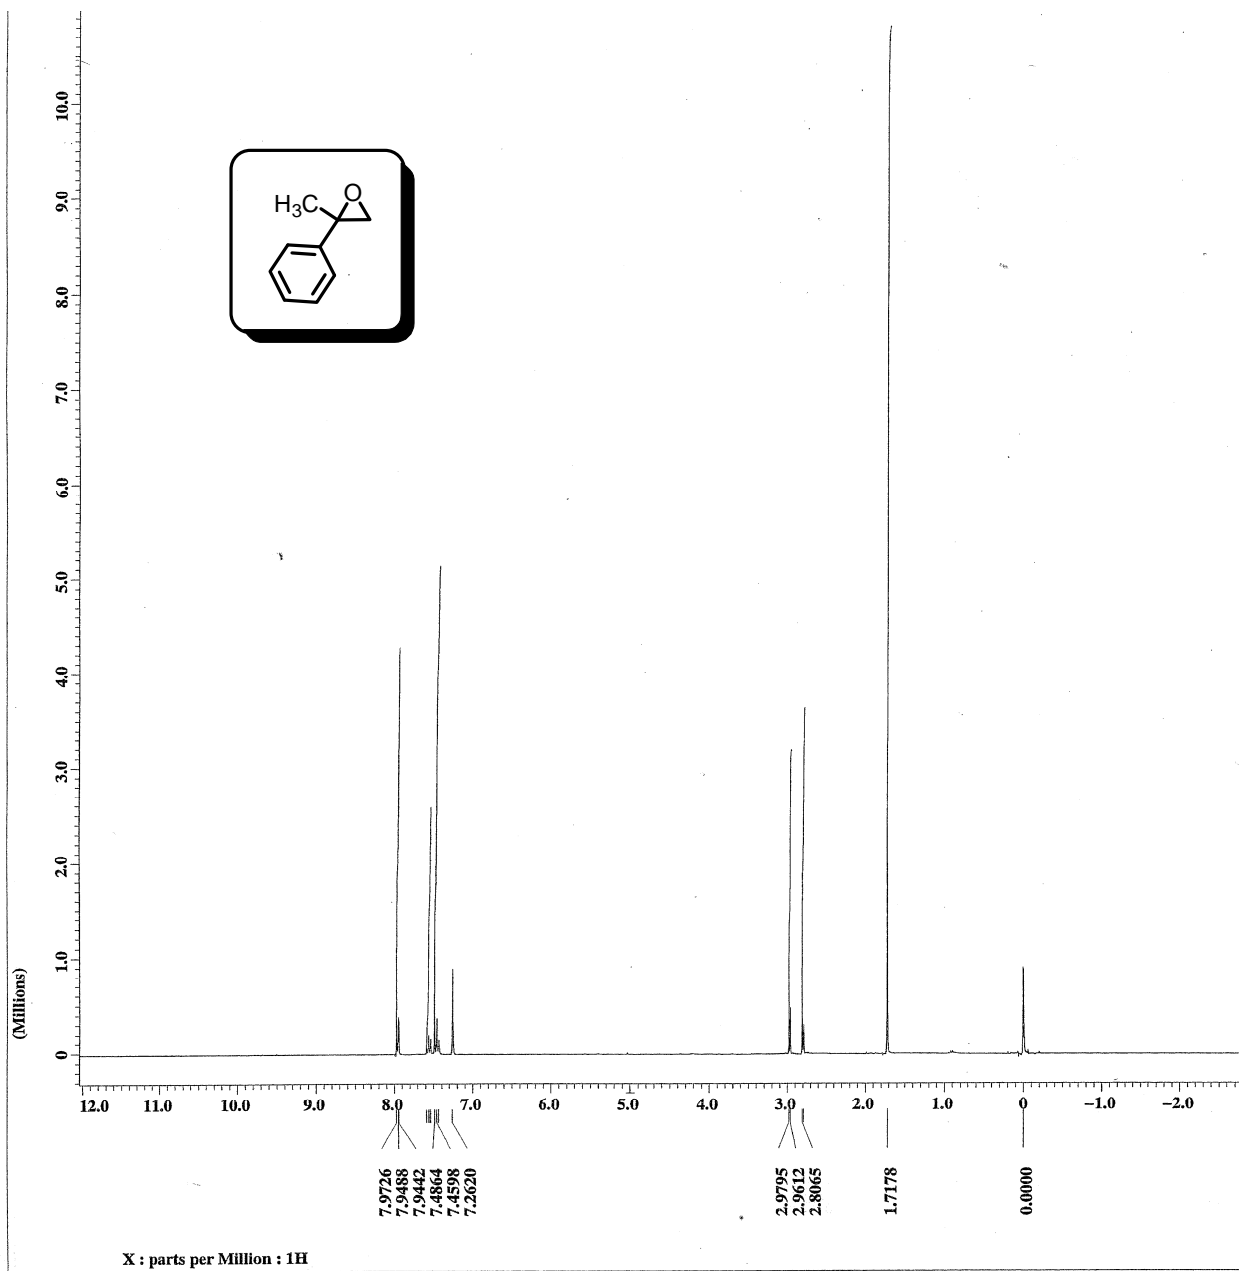

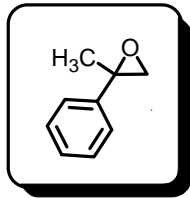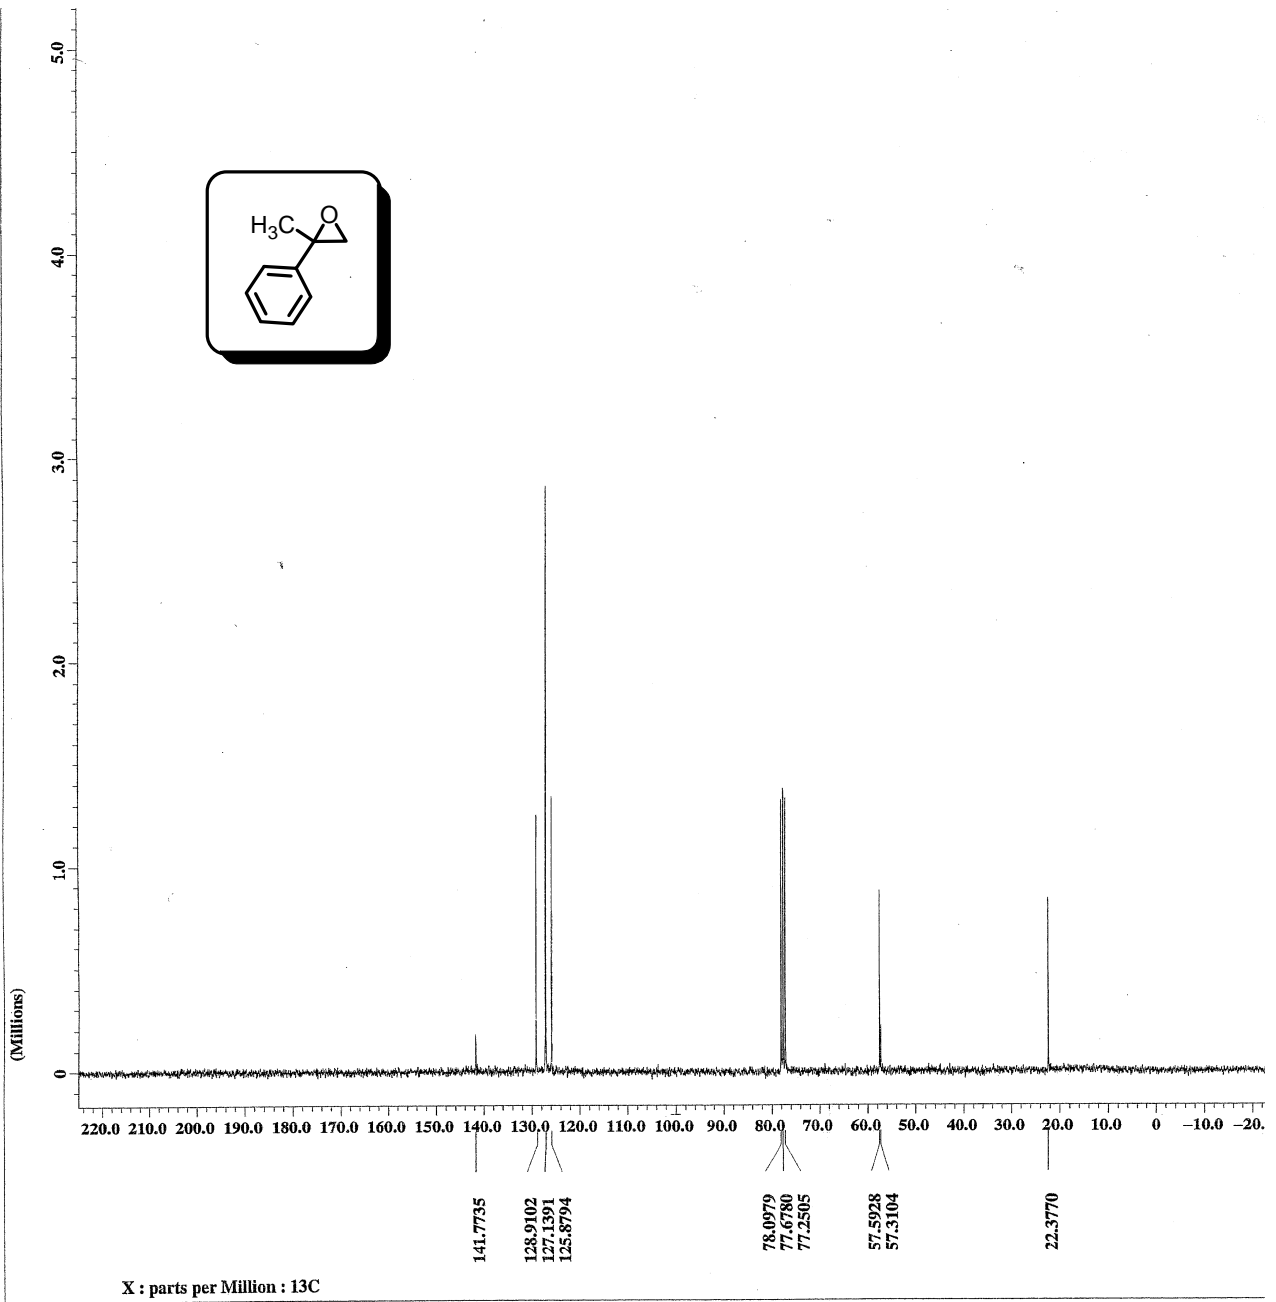

## Representative procedure for the kinetic resolution of aryl oxiranes

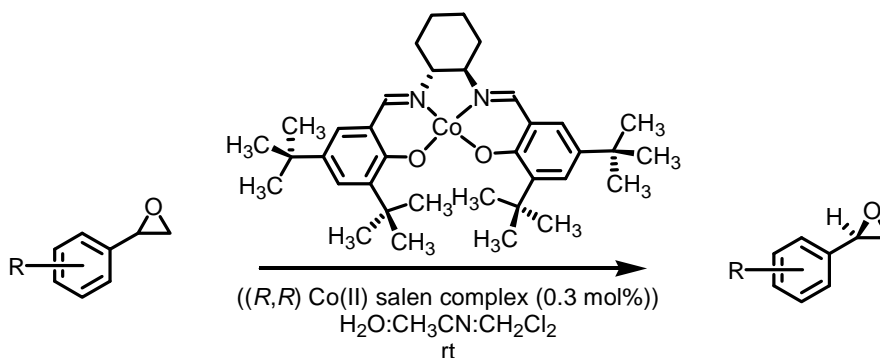

To a 25 mL round bottom flask with stir bar, was added oxirane (12.5 mmol), H<sub>2</sub>O (7.5 mmol), a 1:1 mixture of CH<sub>2</sub>Cl<sub>2</sub> and CH<sub>3</sub>CN (0.25 ml), and the cobalt(II) salen complex (0.3 mol%). The reaction mixture was allowed to stir at room temperature. During that time, the reaction was monitored by <sup>1</sup>H NMR using as markers the diagnostic peaks associated with oxirane and diol. Upon observing 50% conversion, the reaction was judged as complete. Workup involved filtering the reaction mixture through a plug of anhydrous Mg<sub>2</sub>SO<sub>4</sub>. The resulting organic solution was then concentrated in vacuo. Prior to HPLC analysis the reaction mixture was purified by column chromatography using neutral alumina (hexanes). All HPLC analyses were performed using a (*R,R*)-Whelk-O 1 column (25 cm x 4.6 mm, 5μm). The mobile phase was hexanes:IPA at a flow rate ranging between 0.9 mL/min to 1.0 mL/min with a detector wavelength of 220nm. Prior to and post each HPLC analysis, runs using chiral racemic aryl oxiranes were performed. In addition to HPLC analyses, optical rotations of chiral non-racemic material were obtained and compared to published values when possible.

**(2R)-2-Phenyloxirane**

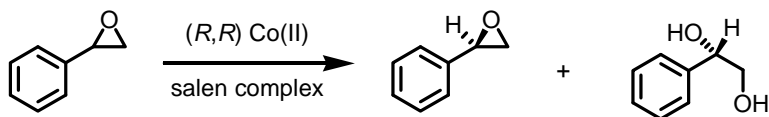

To a mixture consisting of chiral racemic 2-phenyloxirane (1.5 g, 12.5 mmol), H<sub>2</sub>O (0.14 ml, 7.5 mmol) and 1:1 CH<sub>2</sub>Cl<sub>2</sub>:CH<sub>3</sub>CN (0.25ml) was added the cobalt(II) salen complex (0.020 g (R,R)). While monitoring by <sup>1</sup>H NMR, the reaction mixture was allowed to stir at room temperature. After 6 days, the reaction was judged as complete. After purification of the resolved oxirane by column chromatography using neutral alumina, 0.69 g of enantiopure (>99%) (2R)-2-phenyloxirane was obtained (46% recovery). Supplemental data: HPLC (Regis (R,R)-Whelko-O1 column (hexanes:IPA (99:1), 1.0 mL/min, and λ = 220nm) *t<sub>R</sub>* (minor) 5.19 min (*S*), *t<sub>R</sub>* (major) 6.00 min (*R*). Specific rotation of oxirane [α]<sub>D</sub><sup>21</sup> -24 (*c* 1.00, CHCl<sub>3</sub>), [literature [α]<sub>D</sub><sup>31</sup> -23.7 (*c* 1.01, CHCl<sub>3</sub>) for 99% ee]<sup>1</sup> and specific rotation of diol [α]<sub>D</sub><sup>21</sup> +67 (*c* 1.00, CHCl<sub>3</sub>), [literature [α]<sub>D</sub><sup>31</sup> +67 (*c* 1.00, CHCl<sub>3</sub>) for 99% ee (commercial)].

Racemic

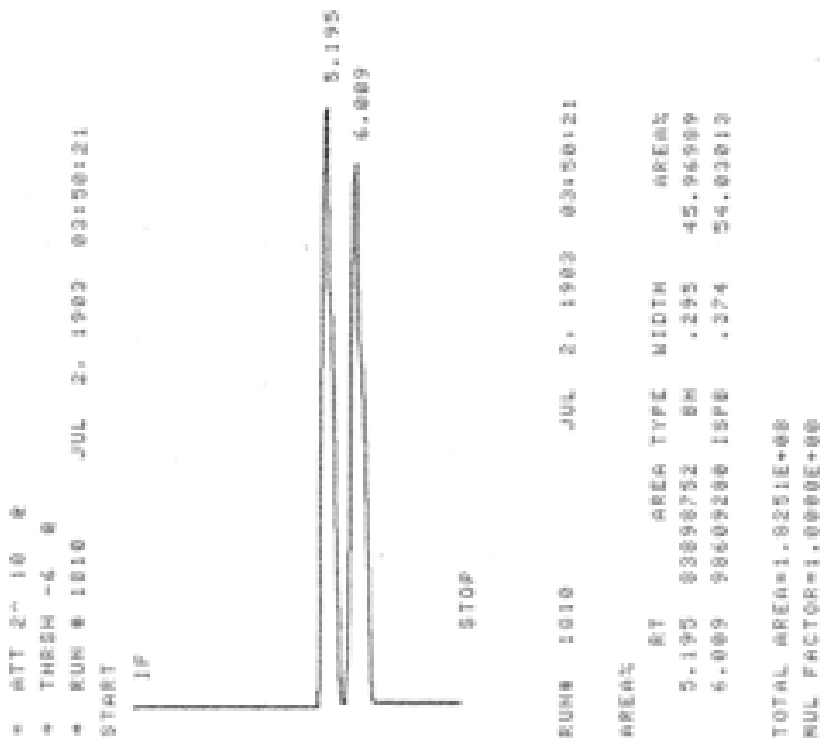

Resolved

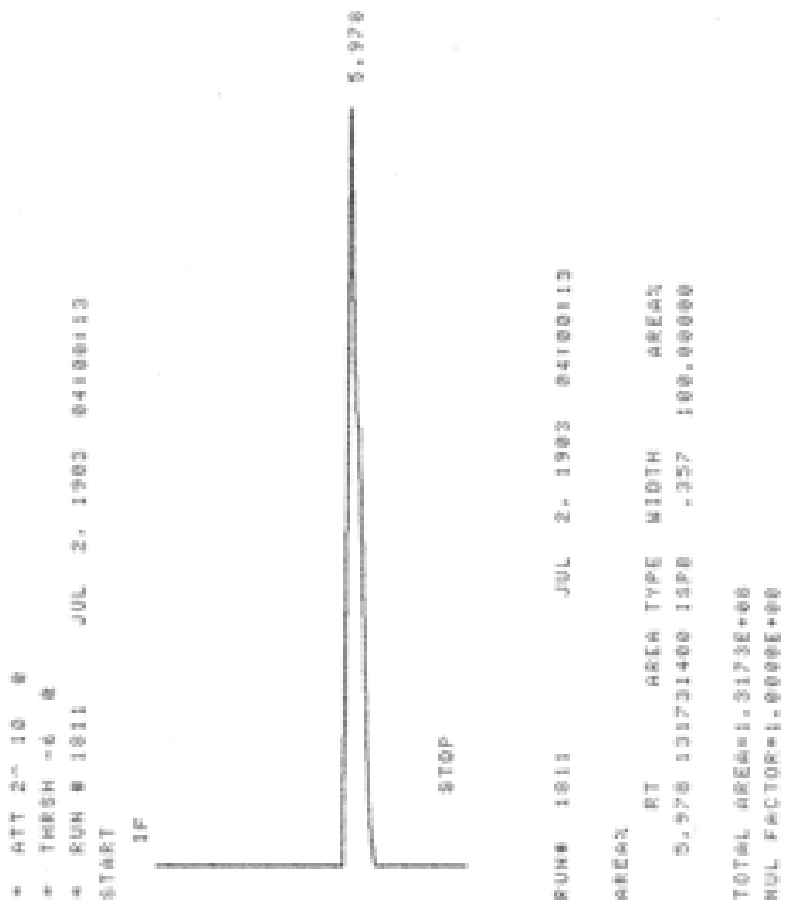

**(2*S*)-2-Phenyloxirane**

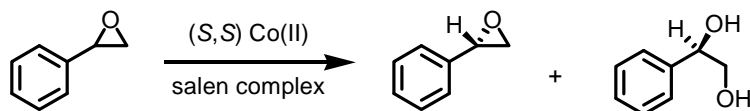

To a mixture consisting of chiral racemic 2-phenyloxirane (1.5 g, 12.5 mmol), H<sub>2</sub>O (0.14 ml, 7.5 mmol) and 1:1 CH<sub>2</sub>Cl<sub>2</sub>:CH<sub>3</sub>CN (0.25ml) was added the cobalt(II) salen complex (0.020 g (*S,S*)). While monitoring by <sup>1</sup>H NMR, the reaction mixture was allowed to stir at room temperature. After 6 days, the reaction was judged as complete. After purification of the resolved oxirane by column chromatography using neutral alumina, 0.688 g of enantiopure (>99%) (2*S*)-2-phenyloxirane was obtained (47% recovery). Supplemental data: HPLC (Regis (*R,R*)-Whelko-O1 column (hexanes:IPA (99:1), 1.0 mL/min, and  $\lambda = 220\text{nm}$ )  $t_R$  (major) 5.19 min (*S*),  $t_R$  (minor) 6.00 min (*R*). Specific rotation  $[\alpha]_D^{21} +24$  ( $c$  1.00, CHCl<sub>3</sub>), [literature  $[\alpha]_D^{22} +24.1$  ( $c$  1.67, CHCl<sub>3</sub>) for 99% ee].<sup>7</sup>

Racemic

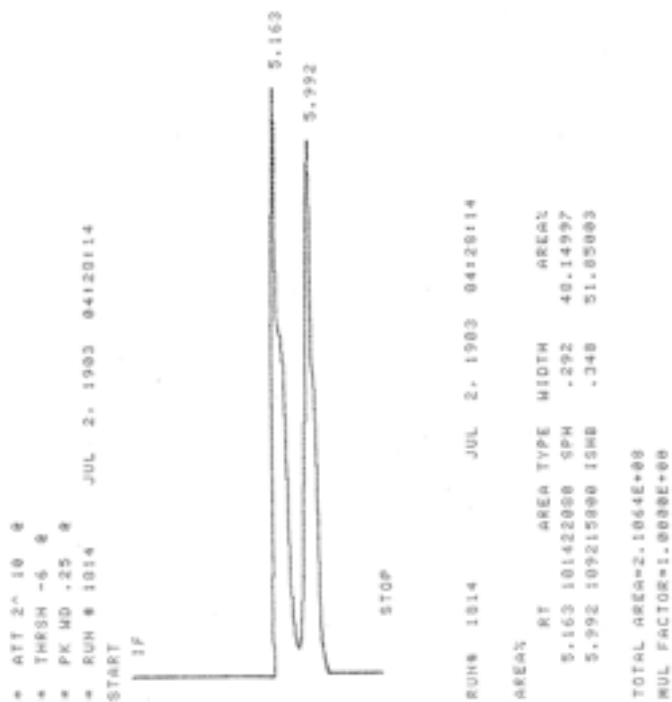

Resolved

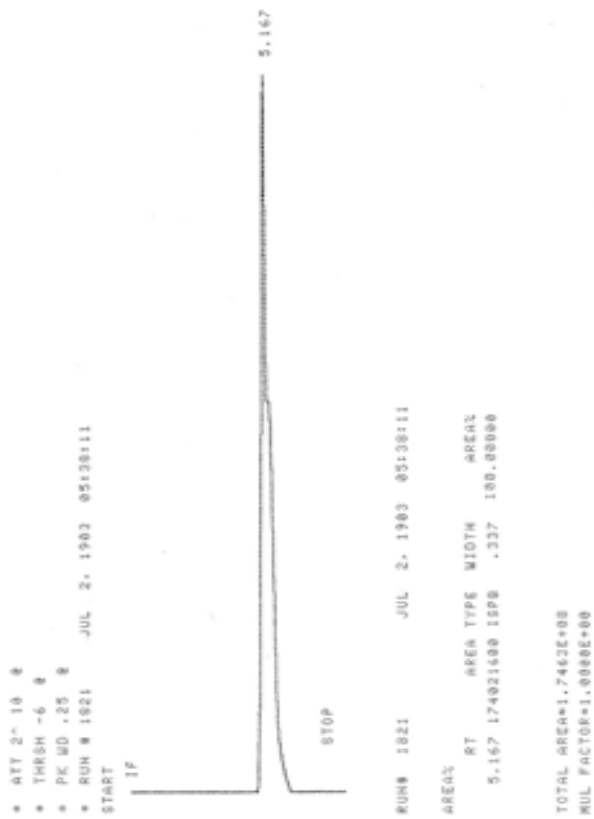



**(2*R*)-2-(4-chlorophenyl)oxirane**

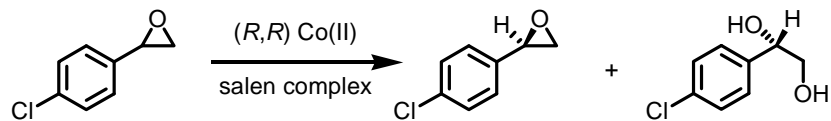

To a mixture consisting of chiral racemic 2-(4-chlorophenyl)oxirane (1.5 g, 12.5 mmol), H<sub>2</sub>O (0.14 ml, 7.5 mmol) and 1:1 CH<sub>2</sub>Cl<sub>2</sub>:CH<sub>3</sub>CN (0.25ml) was added the cobalt(II) salen complex (0.020 g (*R,R*)). While monitoring by <sup>1</sup>H NMR, the reaction mixture was allowed to stir at room temperature. After 6 days, the reaction was judged as complete. After purification of the resolved oxirane by column chromatography using neutral alumina, 0.850 g of enantiopure (>99%) (2*R*)-2-(4-chlorophenyl)oxirane was obtained (45% recovery). Supplemental data: HPLC (Regis (*R,R*)-Whelko-O1 column (hexanes:IPA (99:1), 0.8 mL/min, and λ = 220nm) *t<sub>R</sub>* (minor) 5.05 min (*S*), *t<sub>R</sub>* (major) 5.60 min (*R*). Specific rotation [α]<sub>D</sub><sup>21</sup> -17.2 (*c* 1.0, CHCl<sub>3</sub>), [literature value for enantiomer [α]<sub>D</sub> +19.3 (*c* 1.16, CHCl<sub>3</sub>) for 99% ee].<sup>2</sup>

Racemic

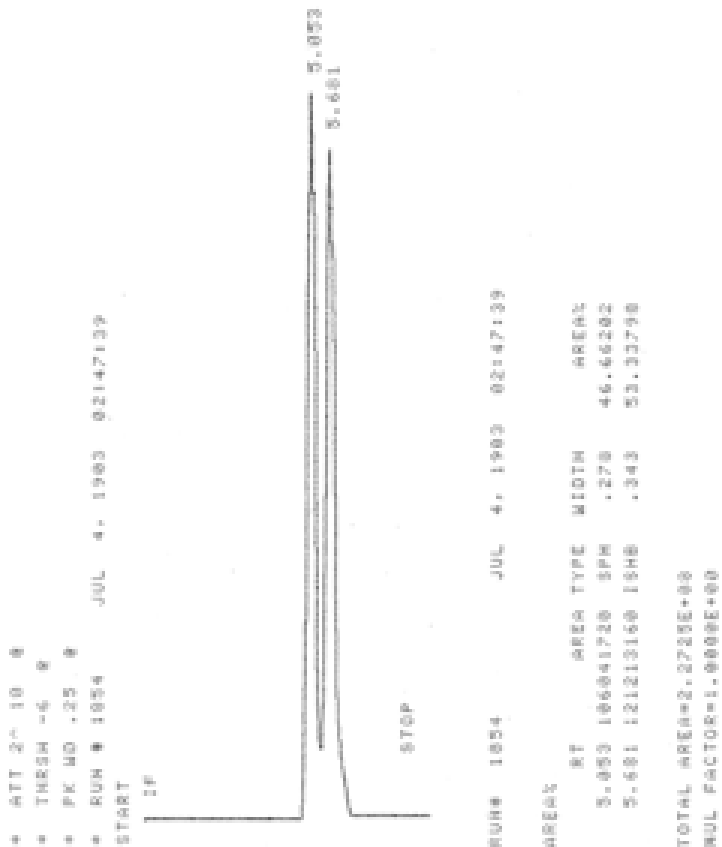

Resolve

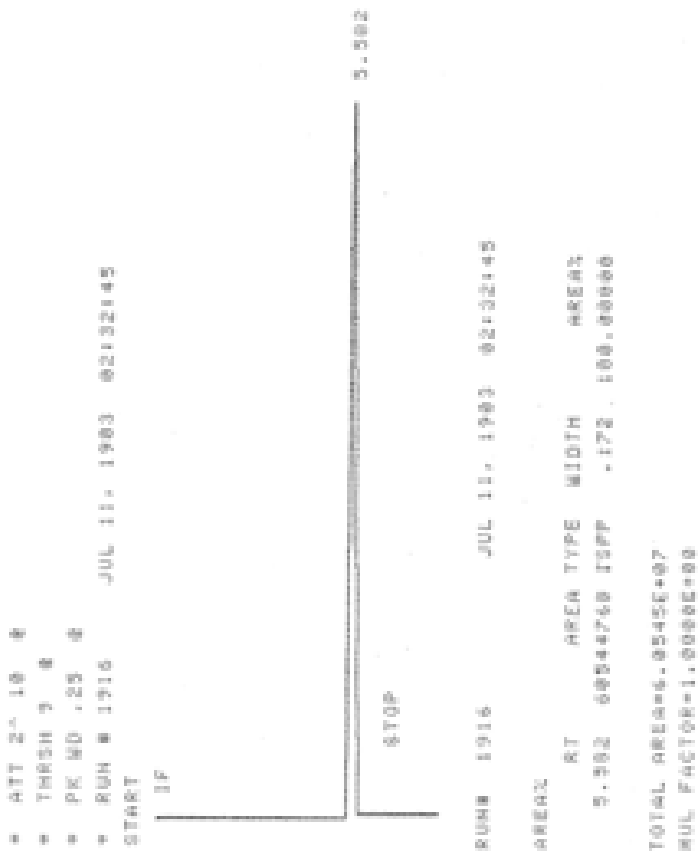

**2-(3-bromo-4-methoxyphenyl)oxirane**

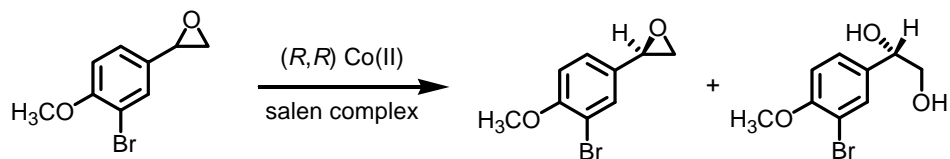

To a mixture consisting of chiral racemic 2-(3-bromo-4-methoxyphenyl)oxirane (1.4 g, 6.0 mmol), H<sub>2</sub>O (0.06 ml, 3.6 mmol) and 1:1 CH<sub>2</sub>Cl<sub>2</sub>:CH<sub>3</sub>CN (0.12ml) was added the cobalt(II) salen complex (0.010 g ( $R,R$ )). While monitoring by <sup>1</sup>H NMR, the reaction mixture was allowed to stir at room temperature. After 6 days, the reaction was judged as complete. After purification of the resolved oxirane by column chromatography using neutral alumina, 0.576 g of enantiopure (>99%) 2-(3-bromo-4-methoxyphenyl)oxirane was obtained (42% recovery). Supplemental data: HPLC (Regis ( $R,R$ )-Whelko-O1 column (hexanes:IPA (99:1), 1.0 mL/min, and  $\lambda = 220\text{nm}$ )  $t_R$  (minor) 10.21 min,  $t_R$  (major) 12.27 min. Specific rotation  $[\alpha]_D^{21} -9.8$  ( $c$  0.1, CHCl<sub>3</sub>).

Racemic

\* ATT 2^ 10 @  
\* THRSH 9 @  
\* PK WD .25 @  
\* RUN # 1857  
JUL 5, 1983 02:07:13  
START

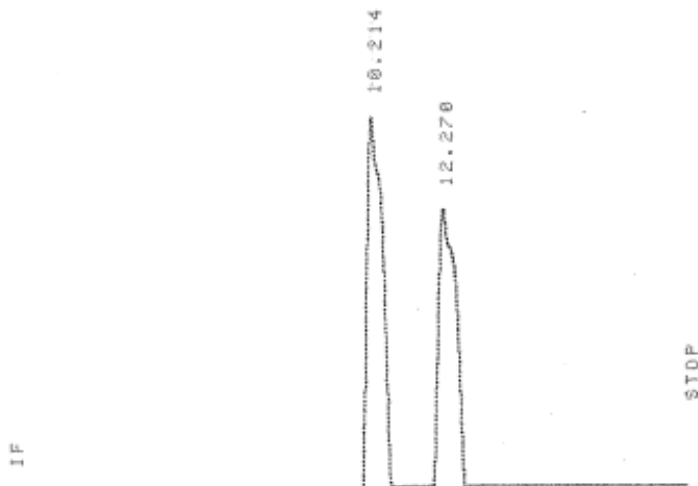

RUN# 1857 JUL 5, 1983 02:07:13

| AREA% | RT     | AREA     | TYPE | WIDTH | AREA%    |
|-------|--------|----------|------|-------|----------|
|       | 10.214 | 89471168 | SBP  | .496  | 52.76795 |
|       | 12.270 | 80084736 | SBP  | .584  | 47.23205 |

TOTAL AREA=1.6956E+08  
MUL FACTOR=1.0000E+00

Resolved

\* ATT 2^ 10 @  
\* THRSH -6 @  
\* PK WD .25 @  
\* RUN # 1862  
JUL 5, 1983 03:35:25  
START

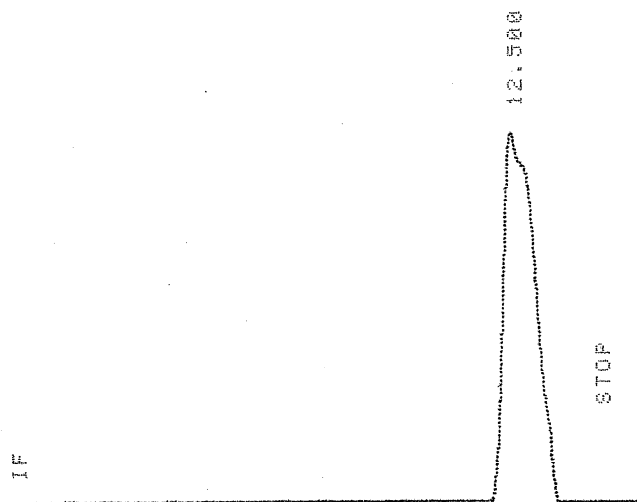

RUN# 1862 JUL 5, 1983 03:35:25

| AREA% | RT     | AREA     | TYPE | WIDTH | AREA%     |
|-------|--------|----------|------|-------|-----------|
|       | 12.500 | 70485632 | ISPB | .683  | 100.00000 |

TOTAL AREA=7.0486E+07  
MUL FACTOR=1.0000E+00

*(2S)*-2-(3,4,5-trimethoxyphenyl)oxirane

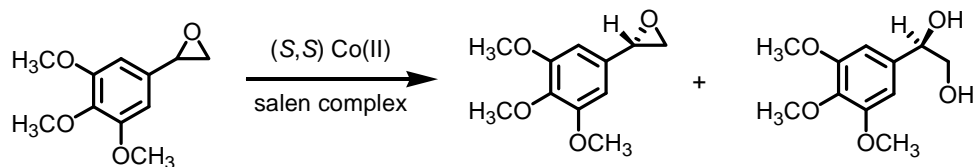

To a mixture consisting of chiral racemic 2-(3,4,5-trimethoxyphenyl)oxirane (1.3 g, 6.25 mmol), H<sub>2</sub>O (0.07 ml, 3.75 mmol) and 1:1 CH<sub>2</sub>Cl<sub>2</sub>:CH<sub>3</sub>CN (0.12ml) was added the cobalt(II) salen complex (0.010 g (*S,S*)). While monitoring by <sup>1</sup>H NMR, the reaction mixture was allowed to stir at room temperature. After 6 days, the reaction was judged as complete. After purification of the resolved oxirane by column chromatography using neutral alumina, 0.383 g of enantiopure (>99%) (*2S*)-2-(3,4,5-trimethoxyphenyl)oxirane was obtained (43% recovery). Supplemental data: Efforts to resolve the enantiomers using chiral HPLC were unsuccessful. Specific rotation [ $\alpha$ ]<sub>D</sub><sup>24</sup> +13.8 (*c* 1.80, CHCl<sub>3</sub>), [literature [ $\alpha$ ]<sub>D</sub> +15.5 (*c* 1.80, CHCl<sub>3</sub>)].<sup>5</sup>

**(2R)-2-(3,4,5-trimethoxyphenyl)oxirane**

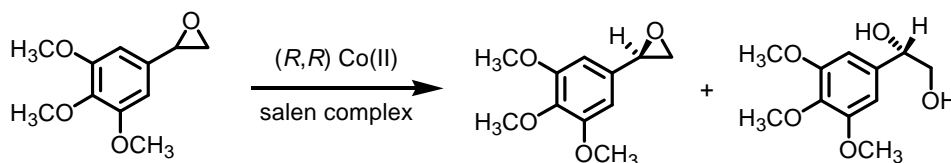

To a mixture consisting of chiral racemic 2-(3,4,5-trimethoxyphenyl)oxirane (0.65 g, 3.1 mmol), H<sub>2</sub>O (0.04 ml, 1.32 mmol) and 1:1 CH<sub>2</sub>Cl<sub>2</sub>:CH<sub>3</sub>CN (0.06 ml) was added the cobalt(II) salen complex (0.005 g (*R,R*)). While monitoring by <sup>1</sup>H NMR, the reaction mixture was allowed to stir at room temperature. After 6 days, the reaction was judged as complete. After purification of the resolved oxirane by column chromatography using neutral alumina, 0.273 g of highly enriched (*2R*)-2-(3,4,5-trimethoxyphenyl)oxirane was obtained (42% recovery). Supplemental data: Efforts to resolve the enantiomers using chiral HPLC were unsuccessful. Specific rotation  $[\alpha]_D^{24} -9.8$  (*c* 0.1, CHCl<sub>3</sub>).

**Literature Cited**

1. White, D. E.; Jacobsen, E. N. *Tetrahedron Asymmetry* **2003**, *14*, 3633.
2. Pedragosa-Moreau, S.; Morisseau, C.; Baratti, J.; Zylber, J.; Archelas, A.; Furstoss, R. *J. Org. Chem.* **1996**, *61*, 7402
3. Moussou, P.; Archelas, A.; Baratti, J.; Furstoss, R. *J. Org. Chem.* **1998**, *63*, 3532.
4. Tsuchiya, Y.; Kymamoto, T.; Ishikawa, T. *J. Org. Chem.* **2004**, *69*, 8504.
5. Ramacciotti, A.; Fiaschi, R.; Napolitano, E. *Tetrahedron Asymmetry* **1996**, *4*, 1101.
6. Ciaccio, J.A.; Drahus, A. L.; Meis, R. E.; Tingle, C.T; Smrtka, M; Geneste, R. *Syn. Commun.* **2003**, *33*, 2135
7. Kolb, H. C.; Sharpless, K. B. *Tetrahedron* **1992**, *48*, 10515.
